# Supplementary material for: Ultra-photostable fluorescent dye molecular engineering—for measuring plant cells’ membrane-spacing through a “deposition-embedding” strategy
Source: Royal Society of Chemistry journal article supplement (doi:10.1039/d4tb02546f), 2025-01-01
Supplement: d4tb02546f1.pdf [file d4tb02546f1.pdf]

# **Ultra-photostable fluorescent dye molecular engineering—for measuring plant cells' membrane-spacing through "deposition- embedding" strategy**

Wendong Jin,<sup>a</sup> Jie Huang,<sup>a</sup> Jie Niu,<sup>b</sup> Shiqian Zhang,<sup>a</sup> Zhiqiang Liu <sup>\*a</sup>, Xiaoqiang Yu<sup>\*a</sup>

<sup>a</sup>State Key Laboratory of Crystal Materials, Shandong University, Jinan 250100, China.

<sup>b</sup>Department of Otolaryngology-Head and Neck Surgery, Shandong Institute of  
Otorhinolaryngology, Shandong Provincial ENT Hospital, Shandong University, Jinan 250022,  
China.

E-mail: zqliu@sdu.edu.cn; yuxq@sdu.edu.cn

|                                              |           |
|----------------------------------------------|-----------|
| <b>1. Experimental section.....</b>          | <b>1</b>  |
| <b>2. Synthetic procedures.....</b>          | <b>3</b>  |
| <b>3. Characterization spectroscopy.....</b> | <b>9</b>  |
| <b>4. X-ray crystallography.....</b>         | <b>21</b> |
| <b>5. Photophysical measurements.....</b>    | <b>37</b> |
| <b>6. Confocal Imaging.....</b>              | <b>42</b> |

## 1. Experimental Section

### Materials and General Information:

All reactants and solvents, unless otherwise stated, were purchased from commercial sources and used as received. Flash chromatography was carried out on silica gel (200-300 mesh).

400MHz  $^1\text{H}$  NMR and 100MHz  $^{13}\text{C}$  NMR spectra were recorded on a Bruker spectrometer. Chemical shifts were expressed in ppm and coupling constants ( $J$ ) in Hz. High-Res MS (HRMS) were record in MALDI (DHB matrix) or ESI modes.

UV-visible absorption spectra were recorded on a U-2910 Double-beam UV/VIS spectrophotometer. The fluorescence data was measured on a F-2700FC spectrophotometer. Fluorescence quantum yields and photoluminescence lifetime were determined on Edinburgh Instruments FLS-980 apparatus.

The suitable crystals for X-ray were grown by slow evaporation from their hexane or hexane/DCM solution. The suitable each crystal was mounted on a nylon loop using a small amount of Paratone N oil. All X-ray measurements were carried on a Bruker SMART diffractometer equipped with a graphite monochromated Cu K $\alpha$  ( $\lambda = 1.54184 \text{ \AA}$ ) radiation source and a CCD detector at 173 K. The frame integration was performed using the program SAINT. The structures were solved by direct method provided by the program package Olex2 and refined a full matrix least square against F2 for all data. All non-hydrogen atoms were refined anisotropically. Absorption correction were applied based on multiple and symmetry-equivalent measurements. The hydrogen atoms were included in the models in calculated positions and were refined as constrained to bonding atoms. CCDC:2389313 (PTBT-H), 2361154 (PTBT-NPh $_2$ ) and 2361155 (PTBT-O-NPh $_2$ ) contains the supplementary crystallographic data for this paper.

### Theoretical Calculations:

Geometry optimizations were performed using the Gaussian 09 program at the B3LYP/6-31+G(d) level of theory. The optimized geometries at the same level were employed for the TD-DFT calculations at the B3LYP/6-31+ G (d) level of theory. For estimation of the NICS (nucleus-independent chemical shift) values of 2, GIAO calculations were performed at the HF/6-31+G (d, p) level using the optimized geometry.

### **Cell culture and imaging:**

HeLa cells were obtained from the Experimental Animal Center of Shandong University. Cells were cultured in H-DMEM supplemented with 10 % fetal bovine serum (FBS) and 1 % penicillin and streptomycin. All of the above cells were cultured in a 5 % CO<sub>2</sub> incubator at 37 °C. Before cell staining, all cells were plated on glass coverslips and allowed to adhere for 24 h. Fresh H-DMEM medium containing 10 μM of PTBT-O-NPh<sub>2</sub> was added to the culture medium of HeLa cells and incubated for 80min before imaging. For co-stain imaging, the HeLa cells were incubated with 2 μM Bodipy 493/503 for 20 min and 5 μM hochechst33342 for 30 min.

For plant cell imaging, PBS buffer was used as the cell survival environment. The probe staining concentration is 20 μM of DiD and PTBT-O-NPh<sub>2</sub>.

Confocal fluorescence imaging was obtained on Olympus FV 1200 laser confocal microscope.

### **Two-photon fluorescence spectroscopy acquisition**

The two-photon fluorescence test was performed by a Ti:Sapphire Mira 900-F femtosecond laser with a pulsed laser light source of 130 fs pulses and a repetition rate of 76 MHz, and the data was recorded with a Spectro Pro 300 i spectrometer. The standard dye Rho B was used as a reference to measure the two-photon absorption cross-sections of the two compounds. The calculation equation was estimated as,

$$\delta_{sam} = \delta_r \times \frac{\Phi_{ref} c_{ref} n_{ref} F_{sam}}{\Phi_{sam} c_{sam} n_{sam} F_{ref}}$$

where  $\delta_{sam}$  and  $\delta_{ref}$  is the two-photon absorption cross-section of samples and reference.  $c_{sam}$  and  $c_{ref}$  are the concentration of sample and reference (10 μM).  $n_{sam}$  and  $n_{ref}$  are the refractive indices of their respective solvents.  $F_{sam}$  and  $F_{ref}$  are the fluorescence integration intensity of two-photon excitation.

**Table S1** Summary of plant cell membrane probes

| Probes                                                                                                                                                                       | Abs/Em      | Staining conditions                                                                                                        | Stained Results                                                                       |
|------------------------------------------------------------------------------------------------------------------------------------------------------------------------------|-------------|----------------------------------------------------------------------------------------------------------------------------|---------------------------------------------------------------------------------------|
| 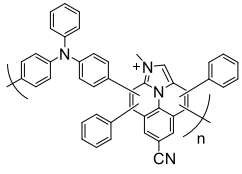 <p>ACS Applied Materials &amp; Interfaces<br/>(DOI: 10.1021/acsami.3c16257)</p>            | 410nm/618nm | staining concentration<br>=10 $\mu$ M,<br>staining time =20 min.<br>$\lambda_{ex}$ =405 nm,<br>$\lambda_{em}$ =600-800 nm. |    |
|  <p>Chemical Science<br/>(DOI: 10.1039/d2sc05727a)</p>                                      | 525nm/660nm | staining concentration<br>=10 $\mu$ M,<br>staining time =5 min.<br>$\lambda_{ex}$ =543nm,<br>$\lambda_{em}$ =600-700nm.    |    |
|  <p>Biosensors and Bioelectronics<br/>(10.1016/j.bios.2024.117039)</p>                     | 450nm/520nm | staining concentration<br>=10 $\mu$ M,<br>staining time =5 min.<br>$\lambda_{ex}$ =473 nm,<br>$\lambda_{em}$ =500-600 nm.  |   |
|  <p>Photochemical &amp; Photobiological<br/>Sciences<br/>(10.1007/s43630-024-00637-z)</p> | 460nm/560nm | staining concentration<br>=10 $\mu$ M,<br>staining time =8 h.<br>$\lambda_{ex}$ =570 nm,<br>$\lambda_{em}$ =590-640 nm.    |  |
|  <p>Journal of Materials Chemistry B<br/>(10.1039/d3tb02601a)</p>                         | 600nm/700nm | staining concentration<br>=10 $\mu$ M,<br>staining time =20min.<br>$\lambda_{ex}$ =633 nm,<br>$\lambda_{em}$ =650-750 nm.  |  |

## 2. Synthetic procedures

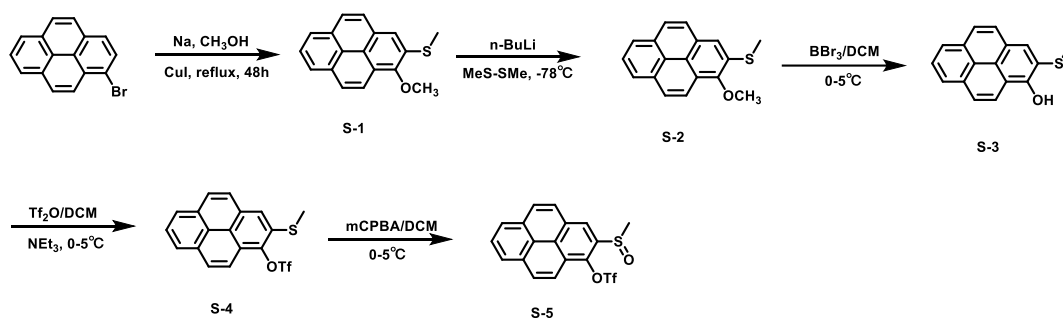

**Scheme S1** The synthesis route of the compound S-5

**Synthesis of S-1:** 1-bromopyrene (2.53 g, 9 mmol) and CuI (0.19 g, 1 mmol) were added to the fresh sodium methylate solution, which by adding Na (1.43 g) into methanol (17.5 mL) under the atmosphere of nitrogen. Then, DMF (7 mL) was added into the mixture. The mixture was then stirred at 90 °C for 48 h. The solvent was evaporated and the residue was purified by silica gel column chromatography using dichloromethane/hexane as eluent to obtain white powder of S-1. Yield: 1.75 g (84 %) <sup>1</sup>H NMR (CDCl<sub>3</sub>, 400 MHz) δ (ppm): 8.46 (d, J = 9.2 Hz, 1H), 8.14 – 8.04 (m, 4H), 7.99 – 7.94 (m, 2H), 7.89 (d, J = 8.9 Hz, 1H), 7.56 (d, J = 8.4 Hz, 1H), 4.18 (s, 3H). <sup>13</sup>C NMR (CDCl<sub>3</sub>, 101 MHz) δ (ppm): 153.69, 131.80, 131.73, 127.30, 126.43, 126.15, 125.84, 125.53, 125.27, 125.01, 124.99, 124.29, 124.20, 121.17, 120.25, 108.08, 56.16. MS (mass m/z): calcd for C<sub>17</sub>H<sub>12</sub>OH<sup>+</sup> [M+H]<sup>+</sup> 233.0961, found for C<sub>17</sub>H<sub>12</sub>OH<sup>+</sup> [M+H]<sup>+</sup>. 233.0960

**Synthesis of S-2:** S-1 (2.3 g, 10 mmol) was added to the dry Tetrahydrofuran solution, then KOt-Bu (1.2 g, 12 mmol) and 2,2,6,6-Tetramethylpiperidine (1.6 g, 12 mmol) were added to the mixture. And then the mixture was cooled down to -78 °C, followed by slow addition of 12.8 mL (20 mmol, 1.6 M in Hexane) of a solution of n-butyllithium in hexane. After addition, the mixture turned yellow. After 50min of stirring, at a constant temperature, Dimethyl disulfide (1.6 g, 10 mmol) was added to the mixture. After slowly rising to room temperature, 20 mL of water was added to the solution and the organic layer was separated, whereas the aqueous layer was extracted two times with 50 mL of ethyl acetate. Then, combined extracts were dried over Na<sub>2</sub>SO<sub>4</sub>. The solvent was evaporated and the residue was purified by silica gel column chromatography using dichloromethane/hexane as eluent to obtain white powder of S-2. Yield: 1.76 g (64 %) <sup>1</sup>H NMR (CDCl<sub>3</sub>, 400 MHz) δ (ppm):

8.27 (d, J = 9.2 Hz, 1H), 8.14 (d, J = 7.6 Hz, 2H), 8.09 (d, J = 9.2 Hz, 1H), 8.03 – 7.93 (m, 4H), 4.12 (s, 3H), 2.70 (s, 3H). <sup>13</sup>C NMR (CDCl<sub>3</sub>, 101 MHz) δ (ppm): 150.85, 130.73, 128.50, 126.91, 126.43, 125.83, 125.22, 125.04, 124.80, 123.93, 123.66, 121.57, 120.84, 61.70, 14.99. MS (mass m/z): calcd for C<sub>18</sub>H<sub>14</sub>OSH<sup>+</sup> [M+H]<sup>+</sup> 279.0838, found for C<sub>18</sub>H<sub>14</sub>OSH<sup>+</sup> [M+H]<sup>+</sup> 279.0840.

**Synthesis of S-3:** Boron tribromide (7.2 g, 28.7 mmol) was added to the dry dichloromethane solution (30 mL), and then the mixture was cooled down to 0-5 °C. Then, S-2 (1.8 g, 6.5 mmol) was added into the mixture. And then the mixture was stirred at 0-5 °C overnight. Then 20 mL of water was added to the solution and the organic layer was separated, whereas the aqueous layer was extracted two times with 50 mL of ethyl acetate. Then, combined extracts were dried over Na<sub>2</sub>SO<sub>4</sub>. The solvent was evaporated and the residue was purified by silica gel column chromatography using dichloromethane/hexane as eluent to obtain white powder of S-3. Yield: 1.7 g (99 %) <sup>1</sup>H NMR (CDCl<sub>3</sub>, 400 MHz) δ (ppm): 8.27 (d, J = 7.6 Hz, 2H), 8.18 (t, J = 4.5 Hz, 4H), 8.12 (d, J = 9.0 Hz, 2H), 8.04 (t, J = 7.6 Hz, 1H), 2.74 (s, 3H). <sup>13</sup>C NMR (CDCl<sub>3</sub>, 101 MHz) δ (ppm): 153.39, 135.98, 135.82, 132.01, 131.70, 131.15, 130.78, 130.09, 129.96, 129.70, 129.45, 129.18, 128.20, 128.02, 126.37, 123.75, 45.32, 45.11, 44.90, 44.69, 44.48, 44.28, 44.07, 20.05. MS (mass m/z): calcd for C<sub>17</sub>H<sub>12</sub>OSH<sup>+</sup> [M+H]<sup>+</sup> 265.0681, found for C<sub>17</sub>H<sub>12</sub>OSH<sup>+</sup> [M+H]<sup>+</sup> 265.0669.

**Synthesis of S-4:** S-3 (1.3 g, 5 mmol) and TEA (0.6 g, 6 mmol) was added to the dry dichloromethane solution (20 mL), and then the mixture was cooled down to -10 °C. Then, triflic anhydride (1.7 g, 6 mmol) was added into the mixture. And then the mixture was stirred at -10 °C overnight. Then 20 mL of water was added to the solution and the organic layer was separated, whereas the aqueous layer was extracted two times with 40 mL of ethyl acetate. Then, combined extracts were dried over Na<sub>2</sub>SO<sub>4</sub>. The solvent was evaporated and the residue was purified by silica gel column chromatography using dichloromethane/hexane as eluent to obtain light yellow powder of S-4. Yield: 1.71g (88 %) <sup>1</sup>H NMR (CDCl<sub>3</sub>, 400 MHz) δ (ppm) 8.29 – 8.20 (m, 4H), 8.16 – 8.10 (m, 2H), 8.08 – 7.99 (m, 2H), 2.73 (s, 3H). <sup>13</sup>C NMR (CDCl<sub>3</sub>, 101 MHz) δ (ppm): 140.08, 131.01, 130.89, 130.46, 130.13, 130.04, 129.03, 126.66, 126.62, 126.30, 125.92, 124.54, 124.31, 123.73,

123.67, 119.52, 17.03. MS (mass m/z): calcd for  $C_{18}H_{11}F_3O_3S_2H^+$   $[M+H]^+$  397.0174, found for  $C_{18}H_{11}F_3O_3S_2H^+$   $[M+H]^+$  397.0176.

**Synthesis of S-5:** S-4 (0.198 g, 0.5 mmol) and Boron (tri) fluoride etherate (0.55 mL, 4.3 mmol) was added to the dry dichloromethane solution (8 mL), and then the mixture was cooled down to -20 °C. Then, mCPBA (0.12 g, 0.67 mmol) was added into the mixture. And then the mixture was stirred at -20 °C for 2 h. Then 20 mL of water was added to the solution and the organic layer was separated, whereas the aqueous layer was extracted two times with 15 mL of dichloromethane. Then, combined extracts were dried over  $Na_2SO_4$ . The solvent was evaporated to obtain light yellow powder of S-5. Yield: 0.2 g (99 %)  $^1H$  NMR ( $CDCl_3$ , 400 MHz)  $\delta$  (ppm): 8.81 (s, 1H), 8.36 – 8.31 (m, 4H), 8.27 – 8.20 (m, 2H), 8.16 (t,  $J = 7.7$  Hz, 1H), 3.00 (s, 3H).  $^{13}C$  NMR ( $CDCl_3$ , 101 MHz)  $\delta$  (ppm): 132.56, 131.25, 127.13, 126.36, 126.19, 125.98, 125.08, 123.07, 122.56, 122.38, 122.11, 122.06, 119.93, 118.79, 115.61, 114.88, 72.62, 72.31, 71.99, 38.41. MS (mass m/z): calcd for  $C_{17}H_{12}OSH^+$   $[M+H]^+$  413.0124, found for  $C_{17}H_{12}OSH^+$   $[M+H]^+$  413.0109.

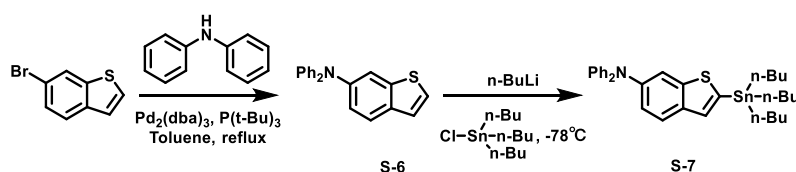

**Scheme S2** The synthesis route of the compound S-7

**Synthesis of S-6:** 6-Bromobenzo[b]thiophene (2.52 g, 11.8 mmol) and Diphenylamine (2 g, 11.8 mmol) were added to the dry toluene solution. Then, KOt-Bu (1.6 g, 14.18 mmol),  $Pd_2(dba)_3$  (5 % eq) and  $P(t-Bu)_3$  (5 % eq) were added into the mixture. The mixture was then stirred at 120 °C for 8 h. The solvent was evaporated and the residue was purified by silica gel column chromatography using dichloromethane/hexane as eluent to obtain white powder of S-6. Yield: 2.4 g (67 %)  $^1H$  NMR ( $DMSO-d_6$ , 400 MHz)  $\delta$  7.80 (d,  $J = 8.6$  Hz, 1H), 7.64 (d,  $J = 5.4$  Hz, 1H), 7.59 (d,  $J = 2.0$  Hz, 1H), 7.39 (d,  $J = 6.2$  Hz, 1H), 7.32 – 7.26 (m, 4H), 7.07 (dd,  $J = 8.6, 2.1$  Hz, 1H), 7.05 – 6.98 (m, 6H).  $^{13}C$  NMR ( $DMSO-d_6$ , 101 MHz)  $\delta$  (ppm): 144.63, 140.92, 136.06, 129.99, 126.94, 124.85, 124.10, 123.91, 123.23, 122.72, 118.25. MS (mass m/z): calcd for  $C_{20}H_{15}NSH^+$   $[M+H]^+$  302.0998, found  $C_{20}H_{15}NSH^+$   $[M+H]^+$  302.0998.

**Synthesis of S-7:** S-6 (0.3 g, 1 mmol) was added to the dry Tetrahydrofuran solution, then KOt-Bu (0.12 g, 1.2 mmol) and 2,2,6,6-Tetramethylpiperidine (0.16 g, 1.2 mmol) were added to the mixture. And then the mixture was cooled down to  $-78\text{ }^{\circ}\text{C}$ , followed by slow addition of 0.7 mL (1.1 mmol, 1.6 M in hexane) of a solution of n-butyllithium in hexane. After addition, the mixture turned reddish brown. After 50min of stirring, at a constant temperature, tributyltin chloride (0.33 g, 1.1 mmol) was added to the mixture. After slowly rising to room temperature, 20 mL of KF solution was added to the mixture and the organic layer was separated, whereas the aqueous layer was extracted two times with 20 mL of ethyl acetate. Then, combined extracts were dried over  $\text{Na}_2\text{SO}_4$ . The solvent was evaporated to obtain reddish brown oil of S-7. The product was not purified and used directly in the next step.

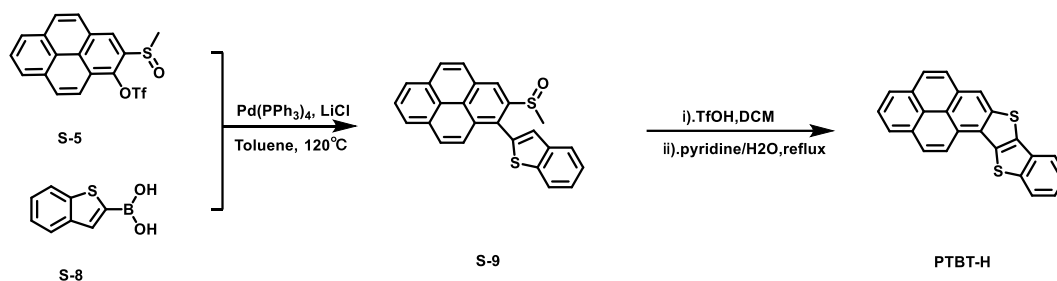

**Scheme S3** The synthesis route of the compound PTBT-H

**Synthesis of S-9:** S-5 (0.2 g, 0.5 mmol) and S-8 (0.11 g, 0.6 mmol) were added to a 10 mL solution of methanol: water: toluene=1:1:1. Then,  $\text{Pd(PPh}_3)_4$  (10 % eq), and  $\text{K}_2\text{CO}_3$  (0.23 g, 1.67 mmol) were added into the mixture. The mixture was then stirred at  $120\text{ }^{\circ}\text{C}$  for 24 h. Then 30 mL of water was added to the mixture and the organic layer was separated, whereas the aqueous layer was extracted two times with 20 mL of ethyl acetate. Then, combined extracts were dried over  $\text{Na}_2\text{SO}_4$ . The solvent was evaporated to obtain reddish brown powder of S-9. The product was not purified and used directly in the next step.

**Synthesis of PTBT-H:** Trifluoromethanesulfonic acid (1 mL) was added to the flask which contains compound S-9 (0.2 g, 0.5 mmol) in 5 mL of dried DCM. The solution was stirred at room temperature for 24 h, and then poured into a water-pyridine mixture (30mL, 8:1). Demethylation was achieved by reflux for 30 min. After cooling to room temperature, dark red precipitate was collected and washed with water and ethanol. The product was purified by column chromatography using dichloromethane/hexane as eluent to obtain green powder of PTBT-H. Yield: 0.14 g (77.8 %)



$^1\text{H}$  NMR ( $\text{CDCl}_3$ , 300 MHz)  $\delta$  (ppm): 8.78 (d,  $J = 9.0$  Hz, 1H), 8.66 (s, 1H), 8.38 (d,  $J = 9.0$  Hz, 1H), 8.29 (d,  $J = 7.7$  Hz, 1H), 8.24 – 8.19 (m, 1H), 8.12 – 7.99 (m, 5H), 7.58 – 7.45 (m, 2H).  $^{13}\text{C}$  NMR (101 MHz, Chloroform- $d$ )  $\delta$  142.98, 140.67, 134.10, 132.71, 132.64, 131.15, 130.63, 129.34, 128.34, 127.89, 127.66, 127.26, 125.88, 125.52, 125.36, 125.31, 125.12, 125.00, 123.80, 123.61, 122.75, 121.61, 119.87. MS (mass  $m/z$ ): calcd for  $\text{C}_{20}\text{H}_{15}\text{NSH}^+$   $[\text{M}+\text{H}]^+$  365.0453, found for  $\text{C}_{20}\text{H}_{15}\text{NSH}^+$   $[\text{M}+\text{H}]^+$  364.0378.

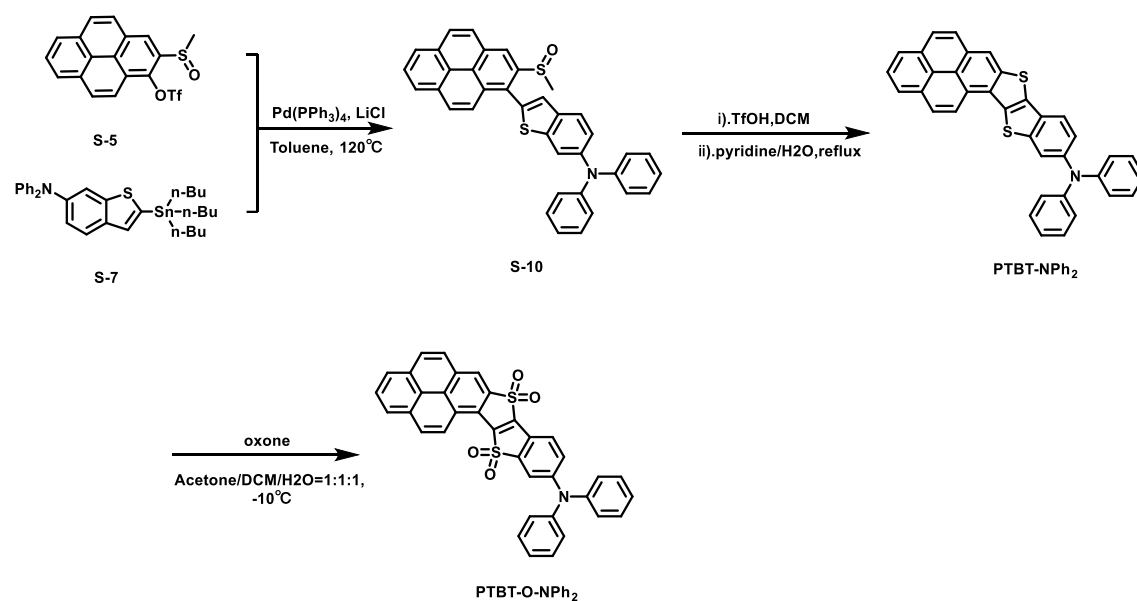

**Scheme S4** The synthesis route of the compound PTBT-NPh<sub>2</sub> and PTBT-O-NPh<sub>2</sub>

**Synthesis of S-10:** S-5 (0.2 g, 0.5 mmol) and S-7 (0.35 g, 0.6 mmol) were added to the dry toluene solution. Then, Pd(PPh<sub>3</sub>)<sub>4</sub> (10 % eq), LiCl (0.1 g, 2.3 mmol) and MgSO<sub>4</sub> (0.2 g, 1.67 mmol) were added into the mixture. The mixture was then stirred at 120 °C for 24 h. Then 30 mL of water was added to the mixture and the organic layer was separated, whereas the aqueous layer was extracted two times with 20 mL of ethyl acetate. Then, combined extracts were dried over Na<sub>2</sub>SO<sub>4</sub>. The solvent was evaporated to obtain reddish brown powder of S-10. The product was not purified and used directly in the next step.

**Synthesis of PTBT-NPh<sub>2</sub>:** Trifluoromethanesulfonic acid (1 mL) was added to the flask which contains compound S-10 (0.28 g, 0.5 mmol) in 5 mL of dried DCM. The solution was stirred at room temperature for 24 h, and then poured into a water-pyridine mixture (30 mL, 8:1). Demethylation was achieved by reflux for 30 min. After cooling to room temperature, dark red precipitate was

collected and washed with water and ethanol. The product was purified by column chromatography using dichloromethane/hexane as eluent to obtain green powder of PTBT-NPh<sub>2</sub>. Yield: 0.12 g (45.5 %) <sup>1</sup>H NMR (CDCl<sub>3</sub>, 400 MHz) δ (ppm): 8.72 (d, J = 9.0 Hz, 1H), 8.65 (s, 1H), 8.36 (d, J = 9.0 Hz, 1H), 8.28 (d, J = 7.7 Hz, 1H), 8.21 (d, J = 7.5 Hz, 1H), 8.11 – 8.01 (m, 3H), 7.87 (d, J = 8.5 Hz, 1H), 7.70 (d, J = 2.1 Hz, 1H), 7.34 – 7.28 (m, 5H), 7.23 – 7.16 (m, 4H), 7.09 (t, J = 7.4 Hz, 2H). MS (mass m/z): calcd for C<sub>36</sub>H<sub>21</sub>NS<sub>2</sub>H<sup>+</sup> [M+H]<sup>+</sup> 532.1188, found C<sub>36</sub>H<sub>21</sub>NS<sub>2</sub>H<sup>+</sup> [M+H]<sup>+</sup> 532.1189.

**Synthesis of PTBT-O-NPh<sub>2</sub>:** Sodium Bicarbonate (1.06 g, 12.6 mmol) was added to the flask which contains compound PTBT-NPh<sub>2</sub> (60 mg, 0.11 mmol) in the solution of (Acetone/DCM/H<sub>2</sub>O=1:1:1, 9 mL) and then, it was cooled down to -10 °C. Then oxone (1.09 g, 7.2 mmol) was added to the solution slowly. The mixture was stirred at -10 °C for 2 h. Then 10 mL of Na<sub>2</sub>S<sub>2</sub>O<sub>3</sub> solution was added to the solution and the organic layer was separated. The aqueous layer was extracted two times with 20 mL of dichloromethane. And then, combined extracts were dried over Na<sub>2</sub>SO<sub>4</sub>. The solvent was evaporated and the residue was purified by silica gel column chromatography using dichloromethane/hexane=1:20 as eluent to obtain purple powder of PTBT-O-NPh<sub>2</sub>. Yield: 5.6 mg (8.3 %) MS (mass m/z): calcd for C<sub>36</sub>H<sub>21</sub>NO<sub>4</sub>S<sub>2</sub>Na<sup>+</sup> [M+Na]<sup>+</sup> 618.0804, found for C<sub>36</sub>H<sub>21</sub>NO<sub>4</sub>S<sub>2</sub>Na<sup>+</sup> [M+Na]<sup>+</sup> 618.0905.

### 3. Characterization spectroscopy

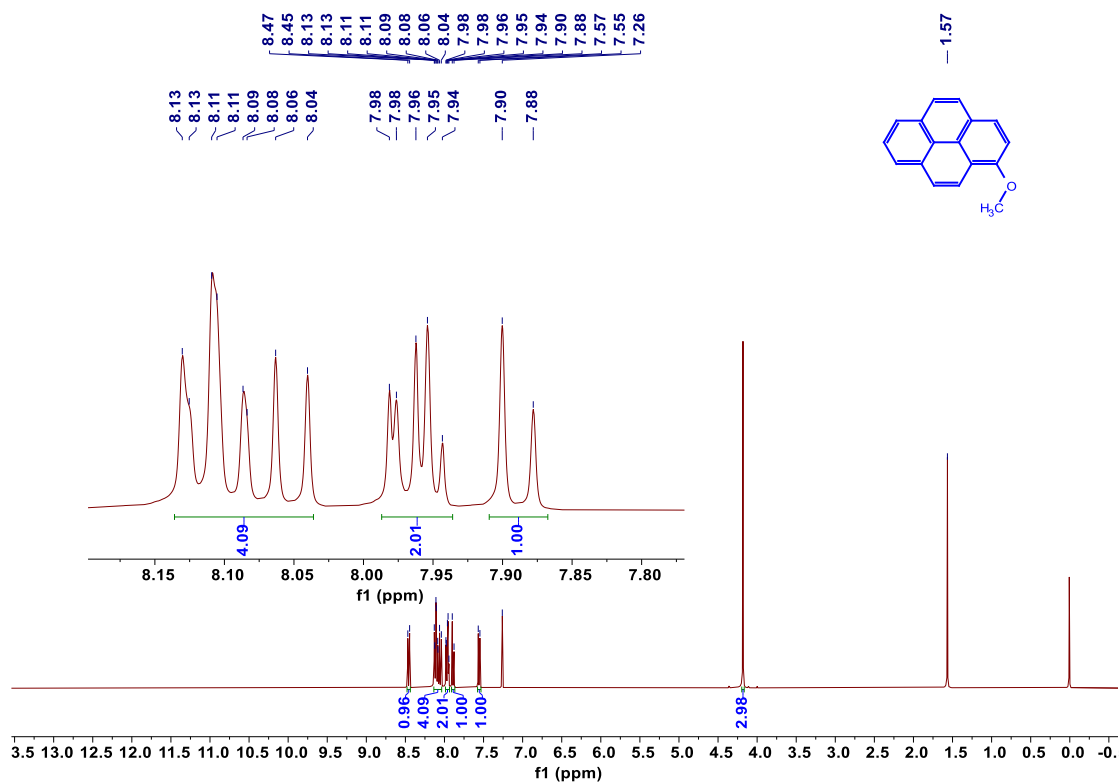

Figure S1 <sup>1</sup>H NMR spectrum of S-1

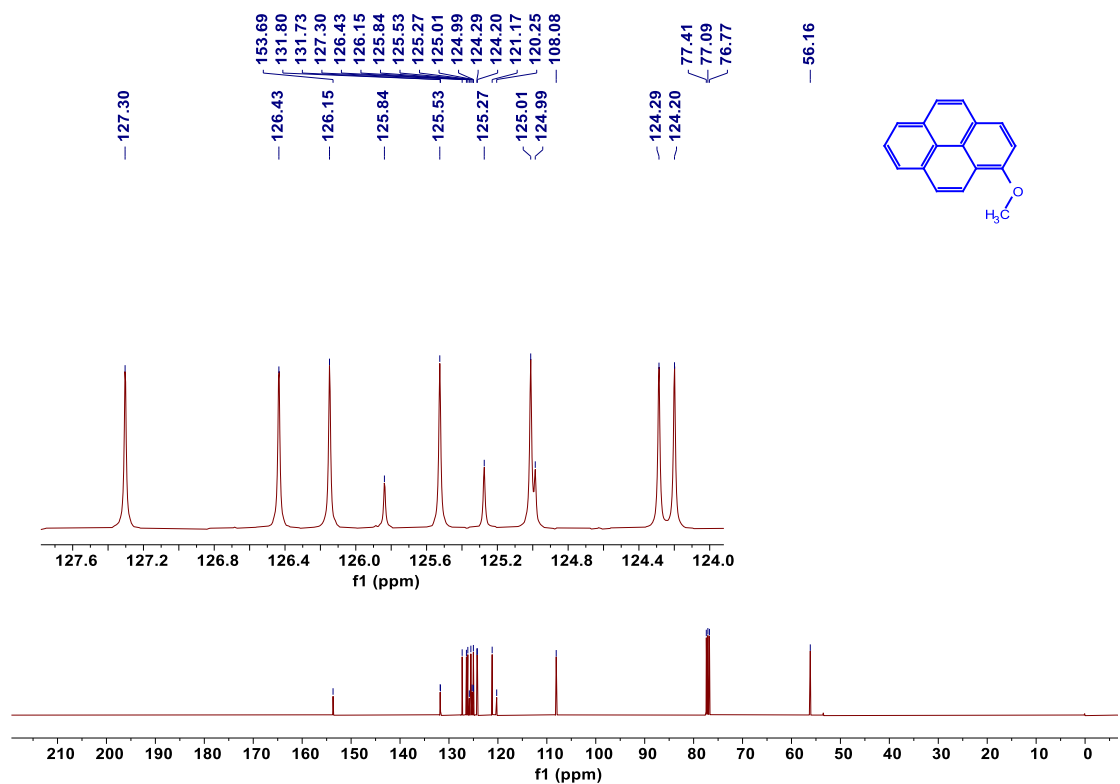

Figure S2 <sup>13</sup>C NMR spectrum of S-1

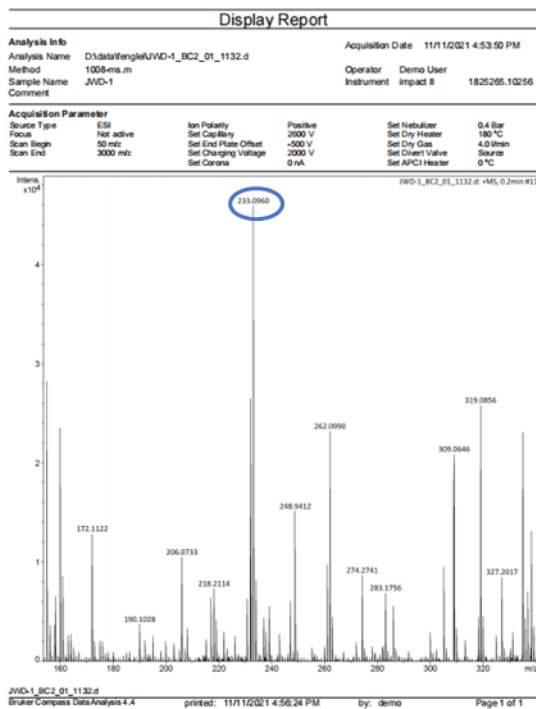

**Figure S3 HRMS spectra of S-1**

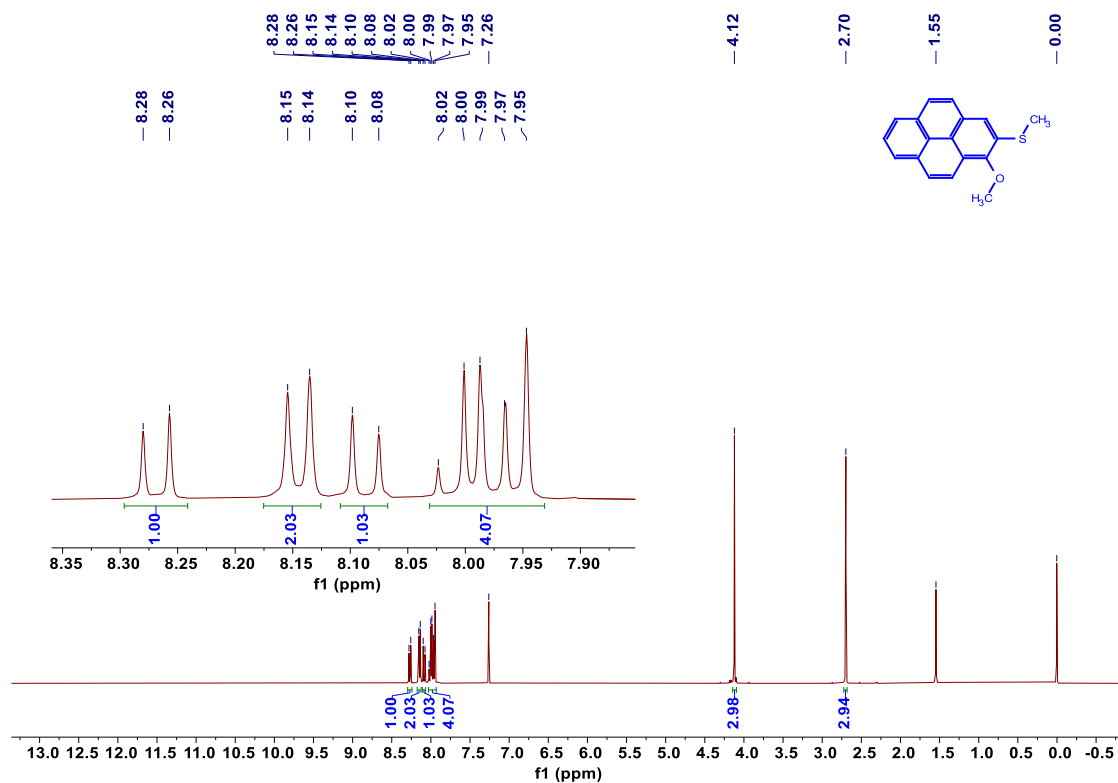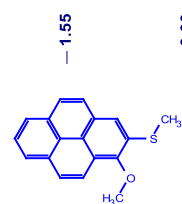

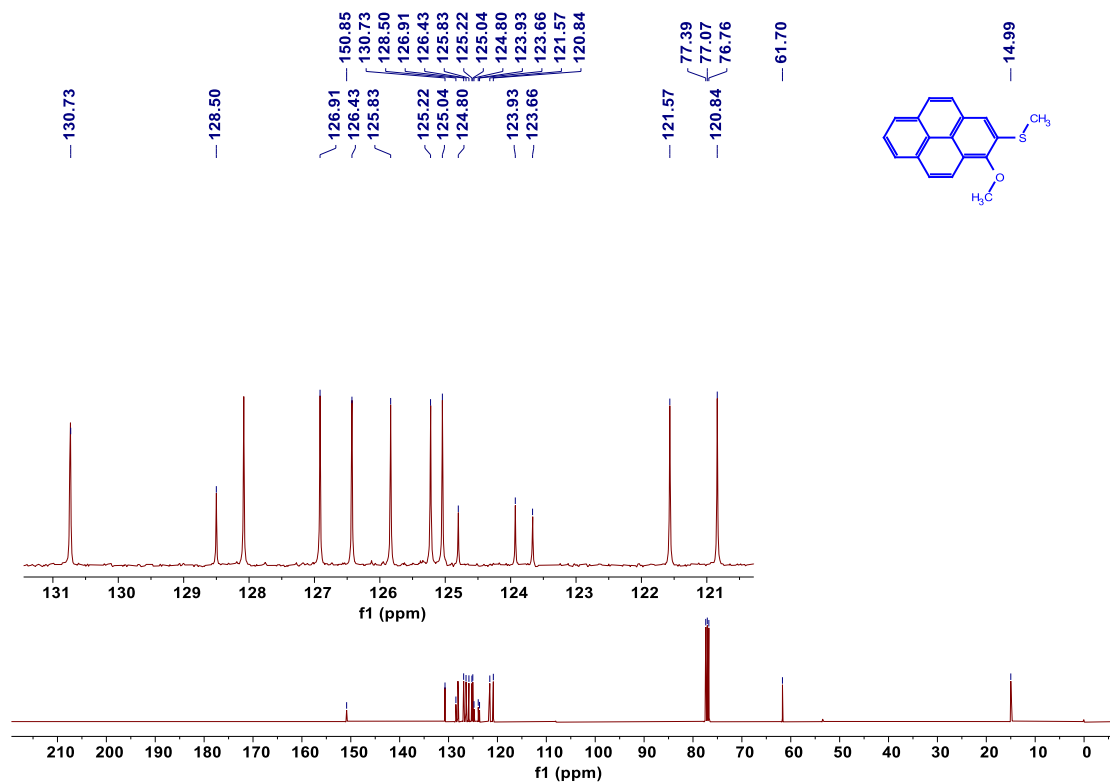

Figure S5  $^{13}\text{C}$  NMR spectrum of S-2

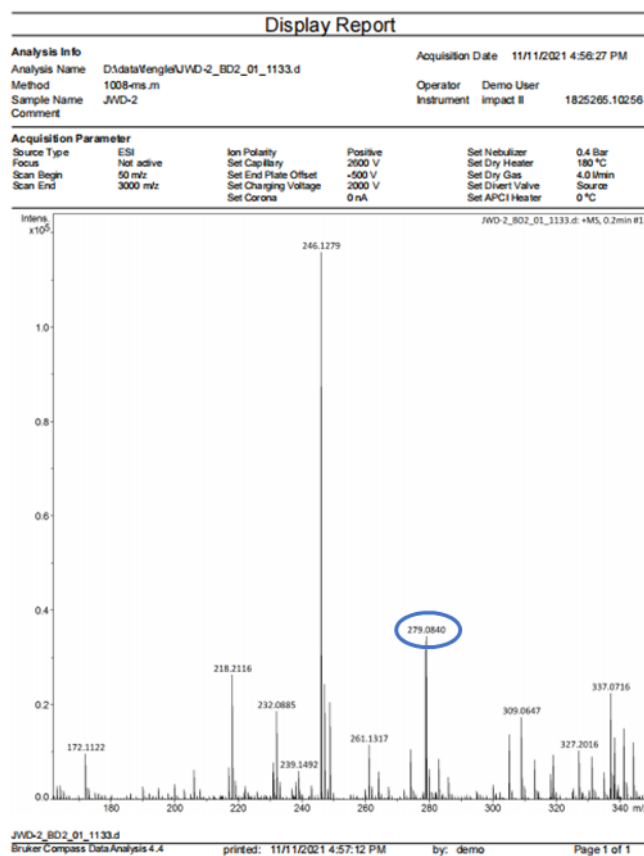

Figure S6 HRMS spectra of S-2

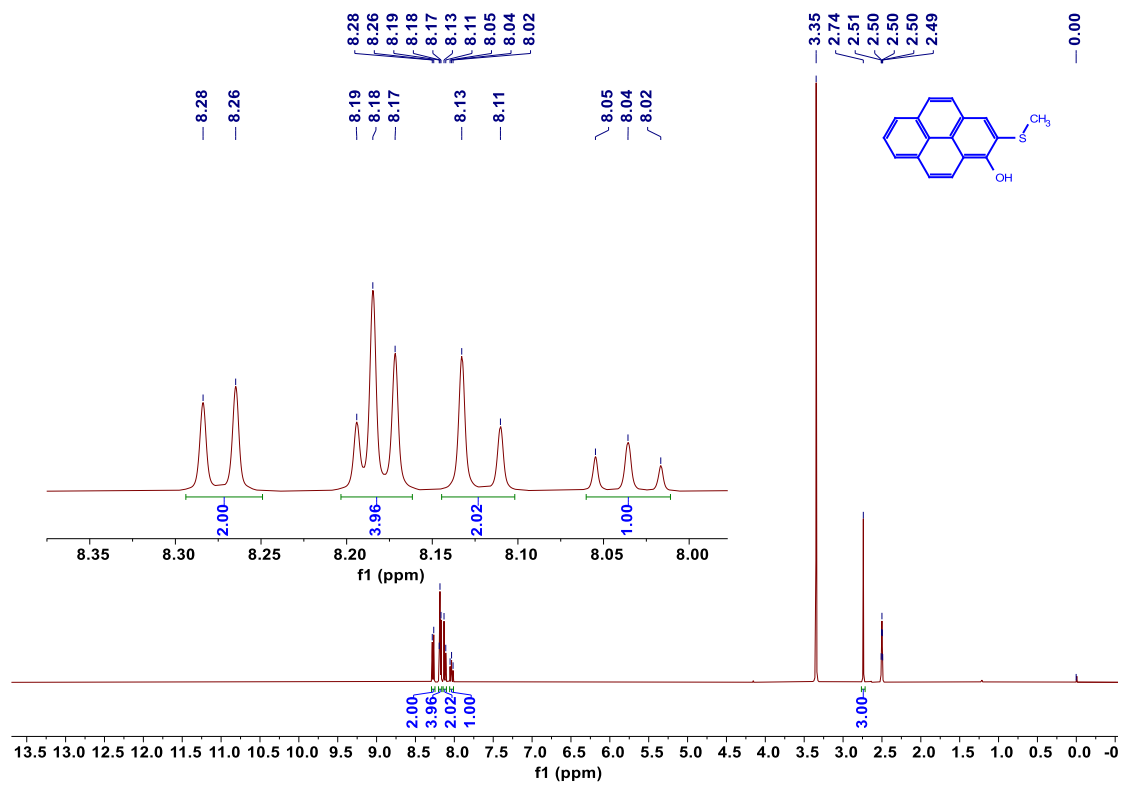

Figure S7  $^1\text{H}$  NMR spectrum of S-3

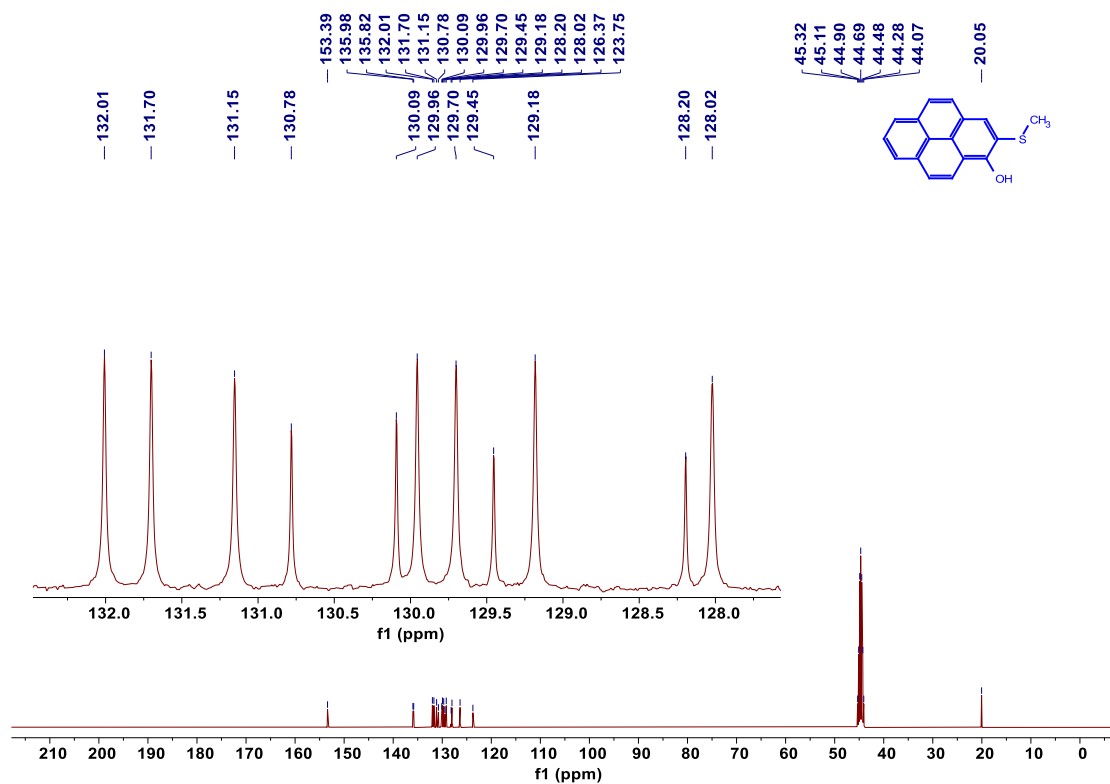

Figure S8  $^{13}\text{C}$  NMR spectrum of S-3

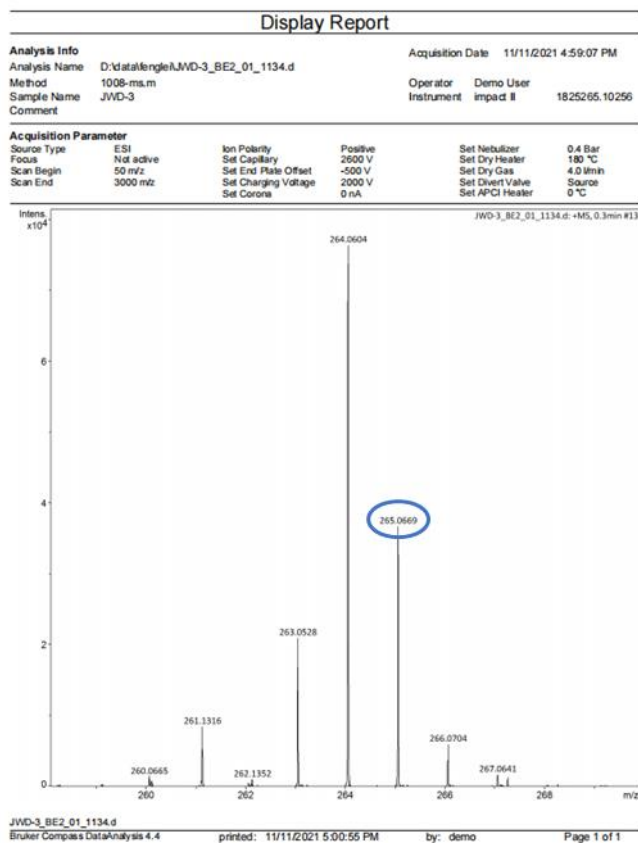

**Figure S9** HRMS spectra of S-3

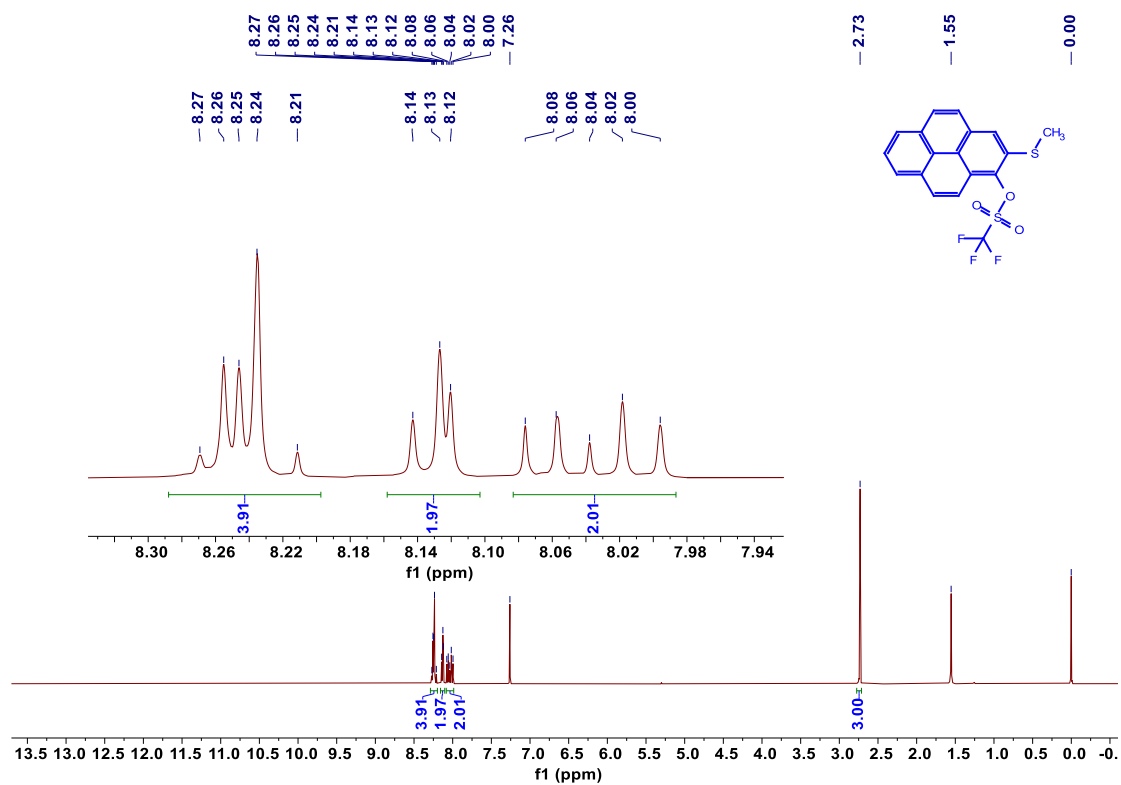

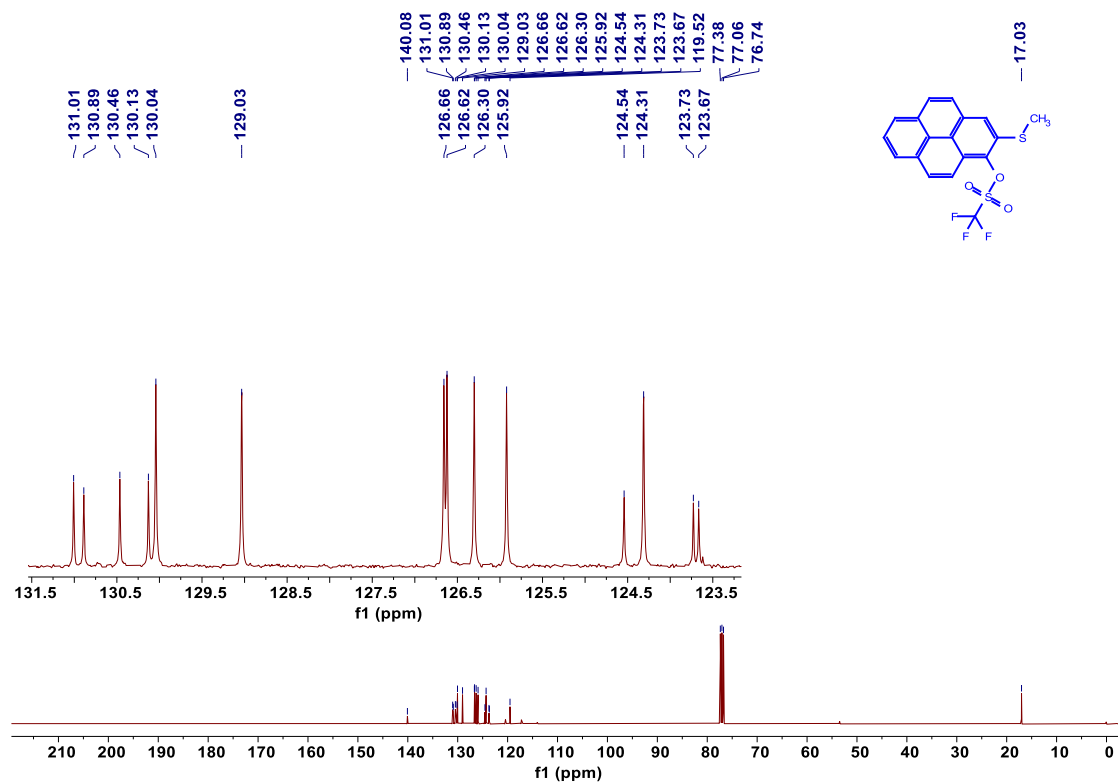

Figure S11  $^{13}\text{C}$  NMR spectrum of S-4

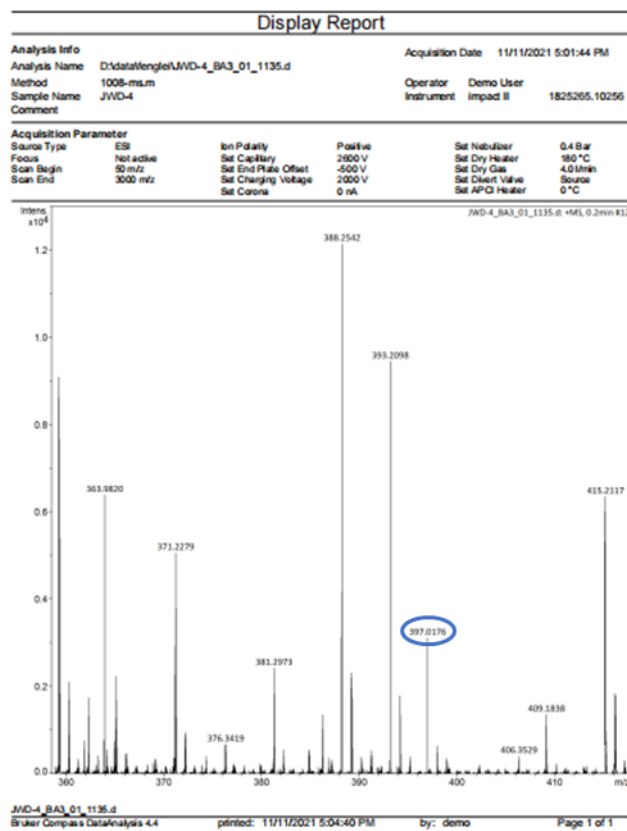

Figure S12 HRMS spectra of S-4



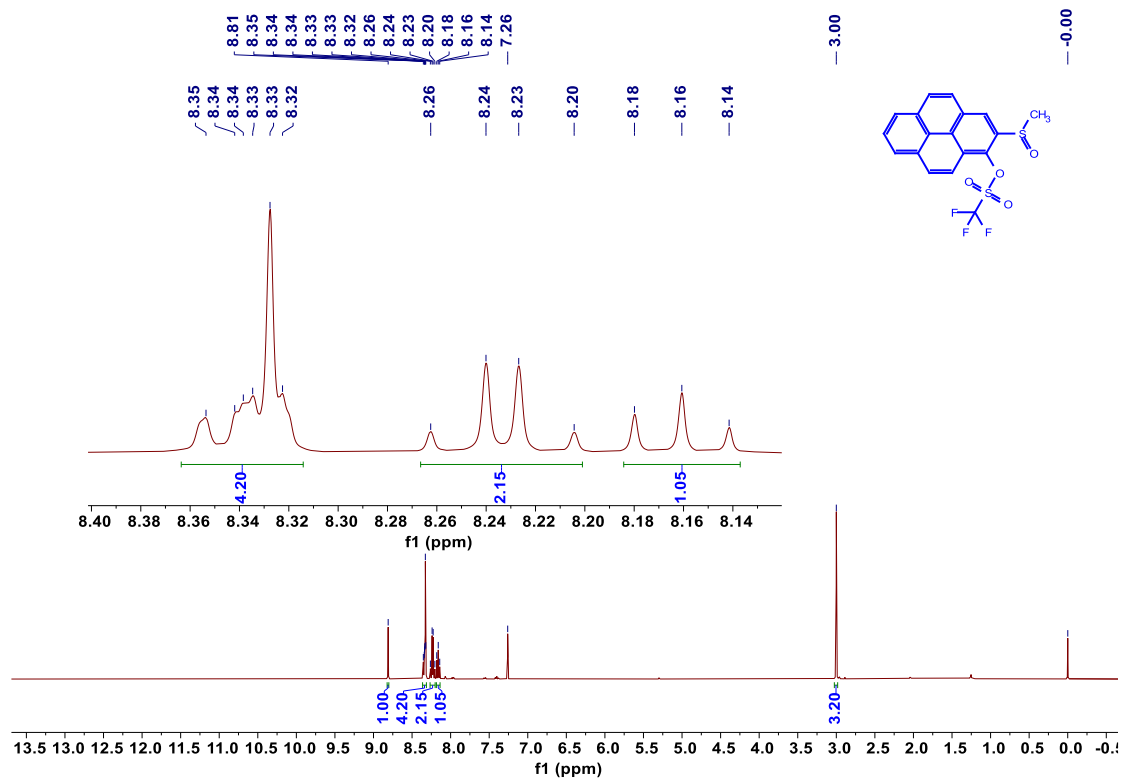

Figure S13 <sup>1</sup>H NMR spectrum of S-5

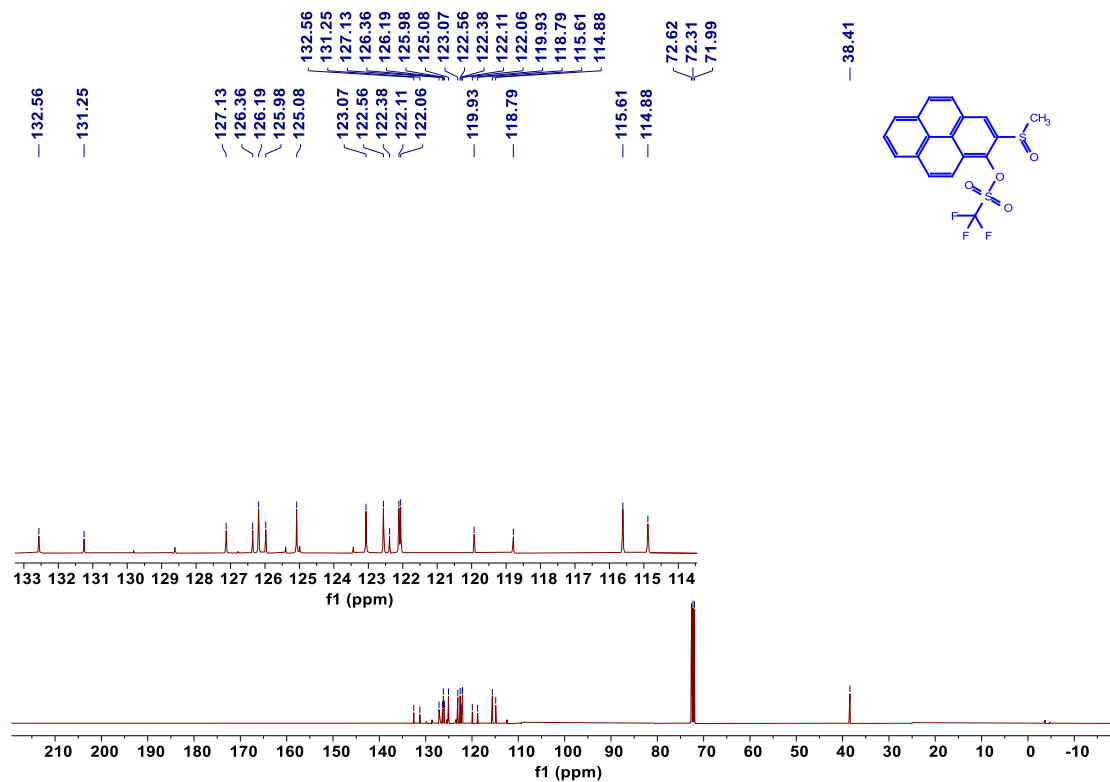

Figure S14 <sup>13</sup>C NMR spectrum of S-5

## Display Report

|                      |                                        |                  |                       |
|----------------------|----------------------------------------|------------------|-----------------------|
| <b>Analysis Info</b> |                                        | Acquisition Date | 4/29/2021 12:46:30 PM |
| Analysis Name        | D:\Data\Angle\WD-Page113_RA3_01_4903.d | Operator         | Demo User             |
| Method               | 1225-1.m                               | Instrument       | Impact II             |
| Sample Name          | WD-Page113                             |                  | 1825265.10256         |
| Comment              |                                        |                  |                       |

|                              |            |                      |           |
|------------------------------|------------|----------------------|-----------|
| <b>Acquisition Parameter</b> |            |                      |           |
| Source Type                  | ESI        | Ion Polarity         | Positive  |
| Focus                        | Not active | Set Capillary        | 2000 V    |
| Scan Begin                   | 50 m/z     | Set End Plate Offset | +500 V    |
| Scan End                     | 1300 m/z   | Set Charging Voltage | 2000 V    |
|                              |            | Set Corona           | 0 nA      |
|                              |            | Set Nebulizer        | 0.4 Bar   |
|                              |            | Set Dry Heater       | 180 °C    |
|                              |            | Set Dry Gas          | 4.0 l/min |
|                              |            | Set Divert Valve     | Source    |
|                              |            | Set APCI Heater      | 0 °C      |

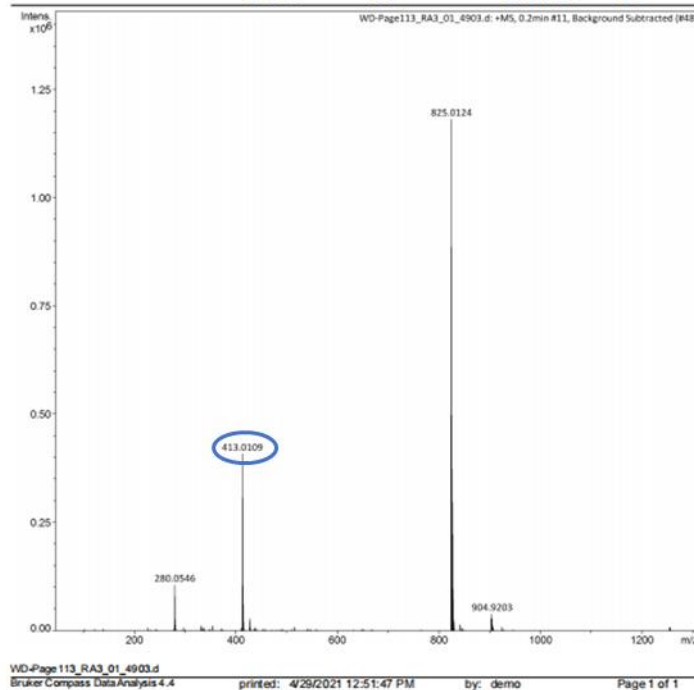

WD-Page113\_RA3\_01\_4903.d  
 Bruker Compass DataAnalysis 4.4 printed: 4/29/2021 12:51:47 PM by: demo Page 1 of 1

**Figure S15 HRMS spectra of S-5**

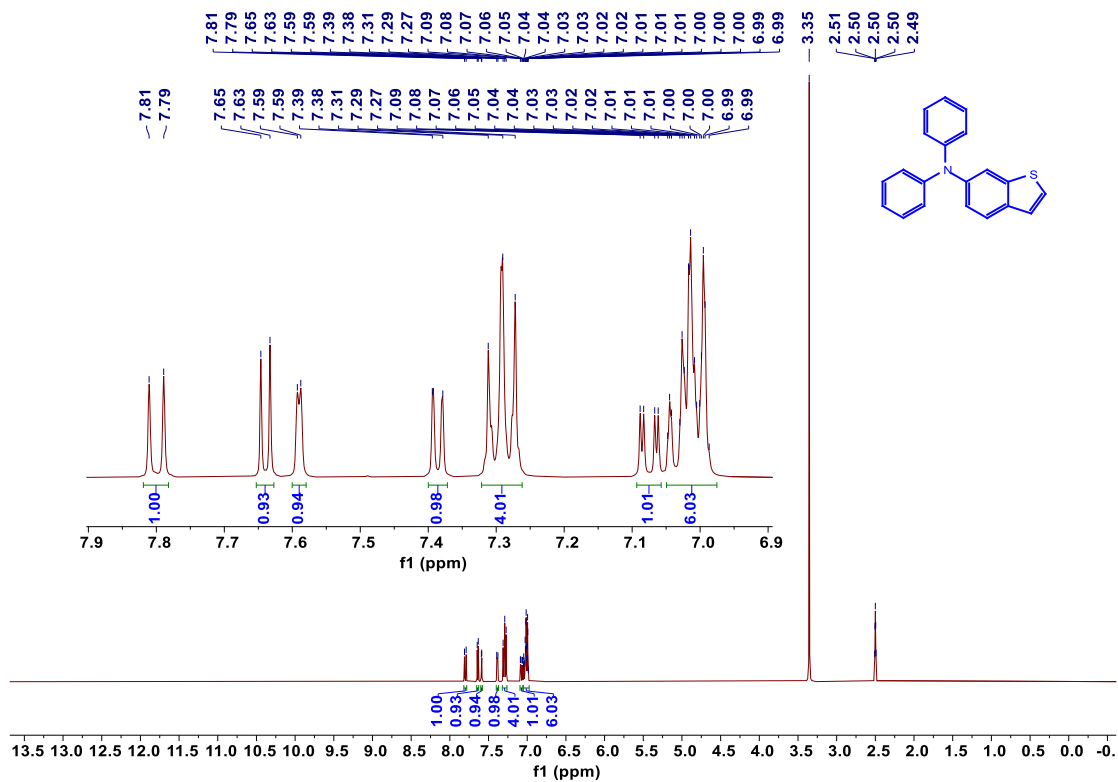

**Figure S16 <sup>1</sup>H NMR spectrum of S-6**

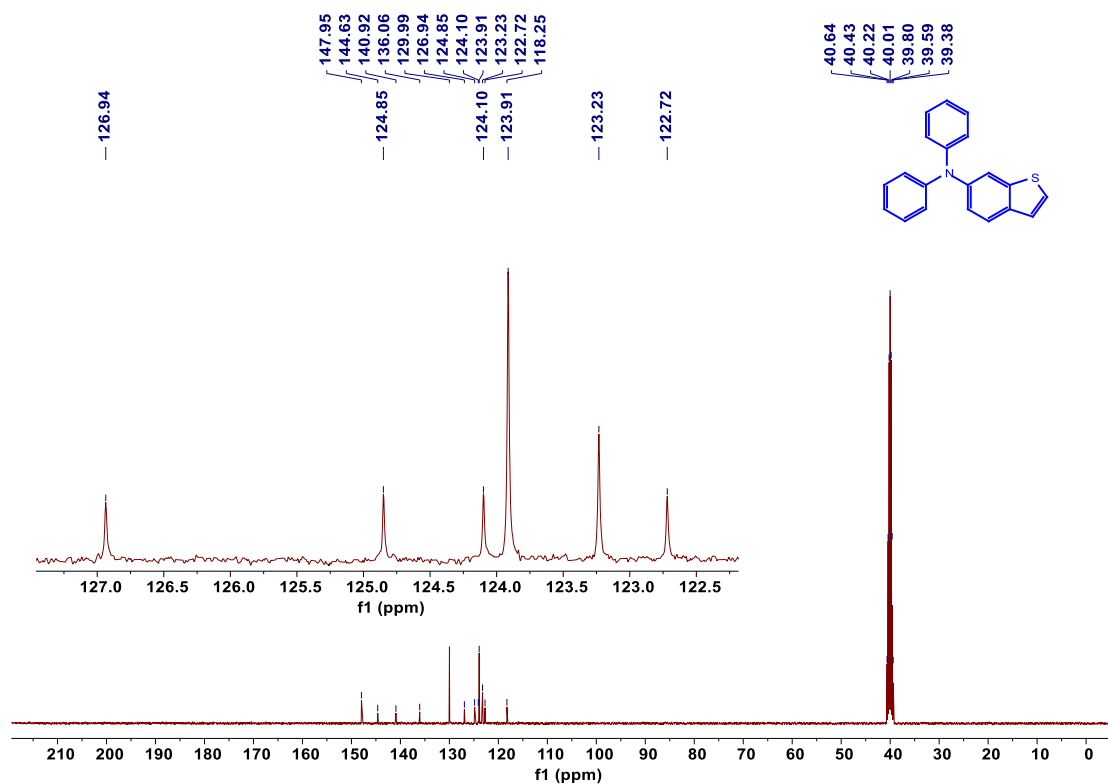

Figure S17 <sup>13</sup>C NMR spectrum of S-6

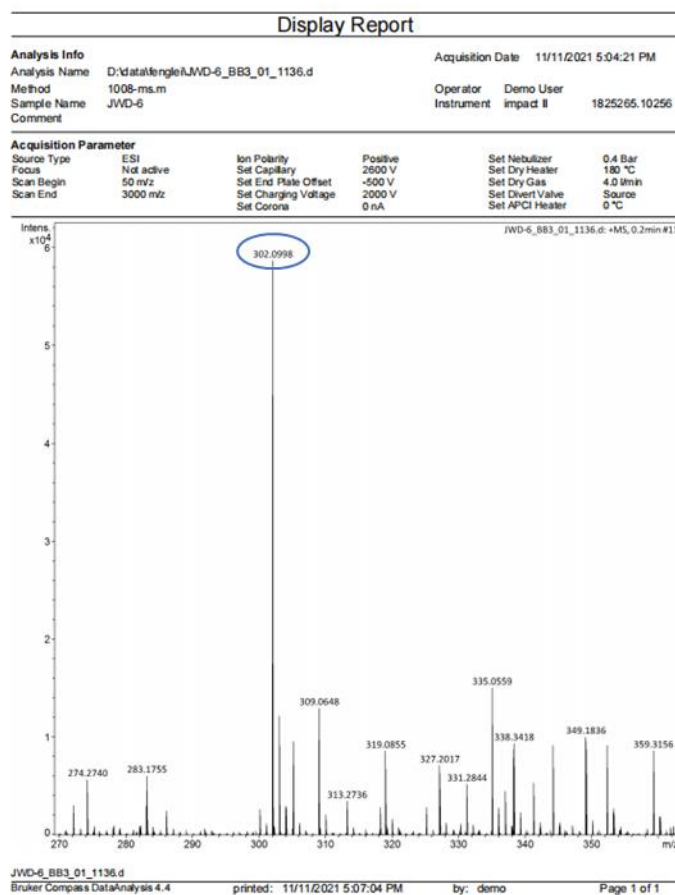

Figure S18 HRMS spectra of S-6

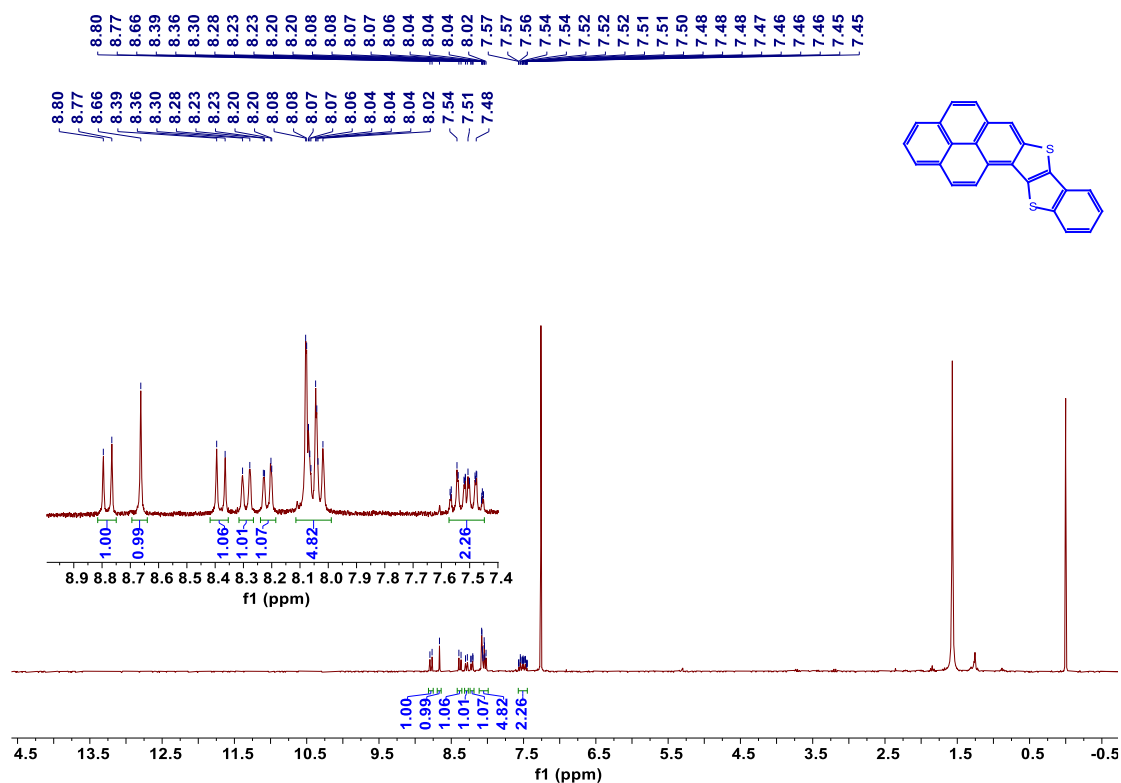

Figure S19  $^1\text{H}$  NMR spectrum of PTBT-H

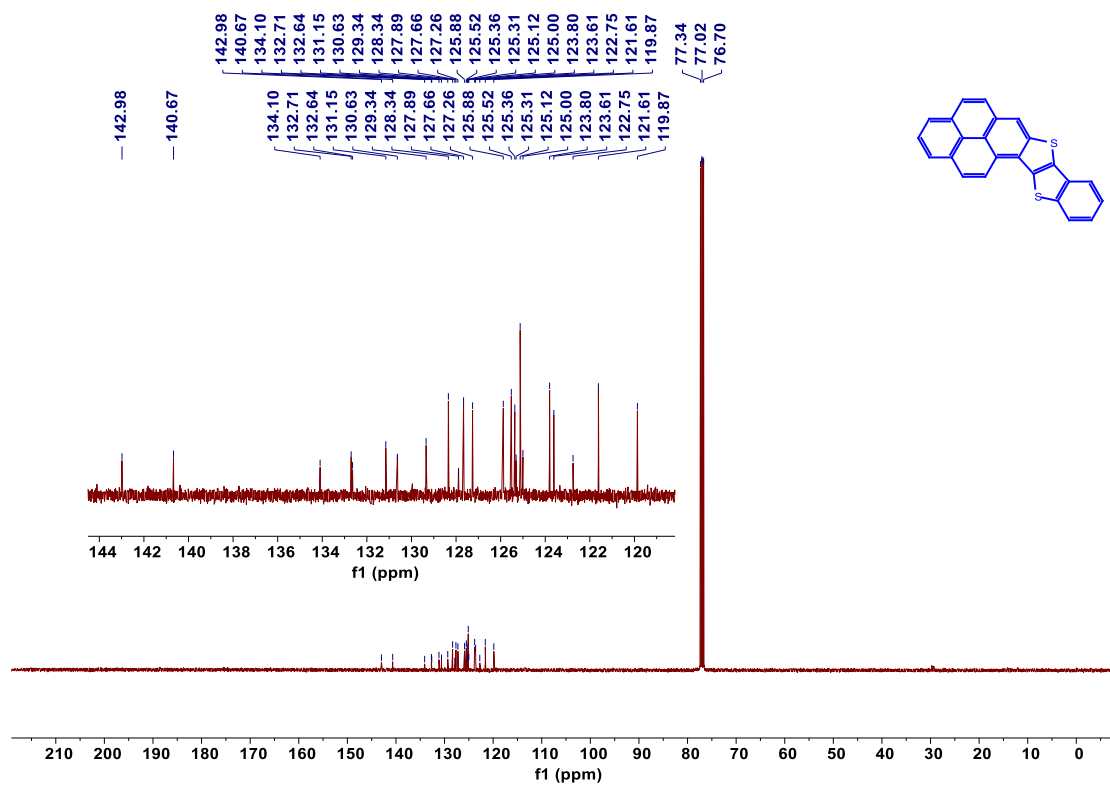

Figure S20  $^{13}\text{C}$  NMR spectrum of PTBT-H

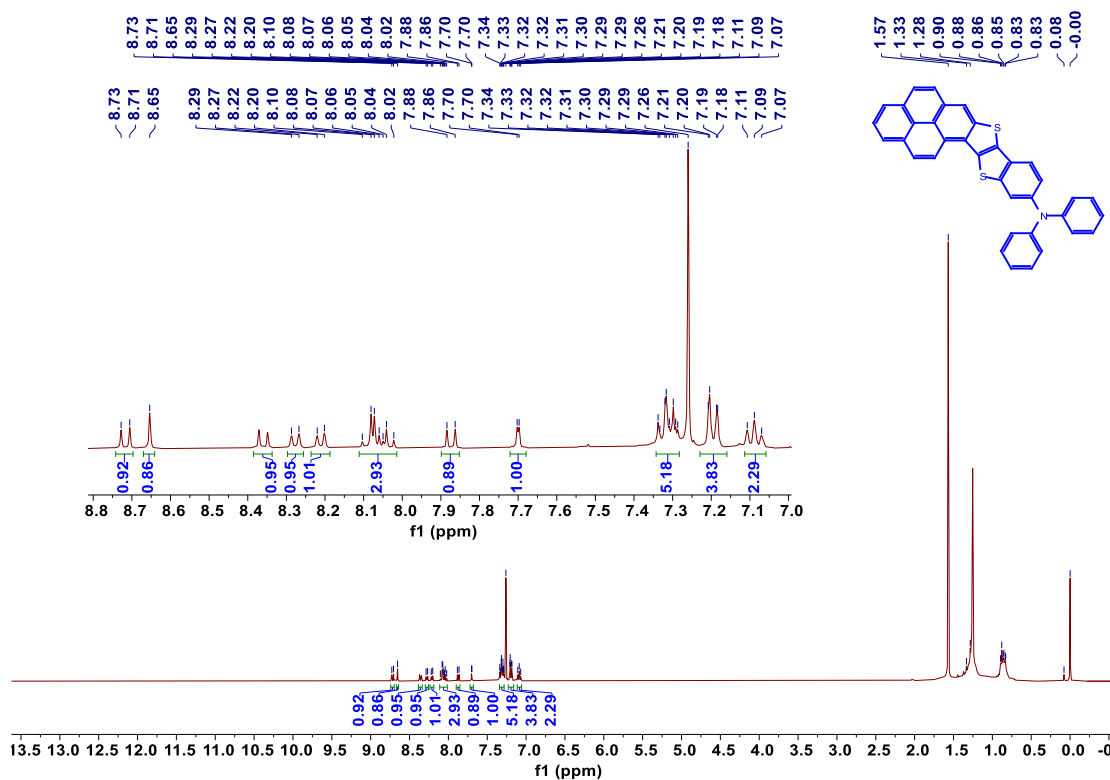

Figure S21 <sup>1</sup>H NMR spectrum of PTBT-NPh<sub>2</sub>

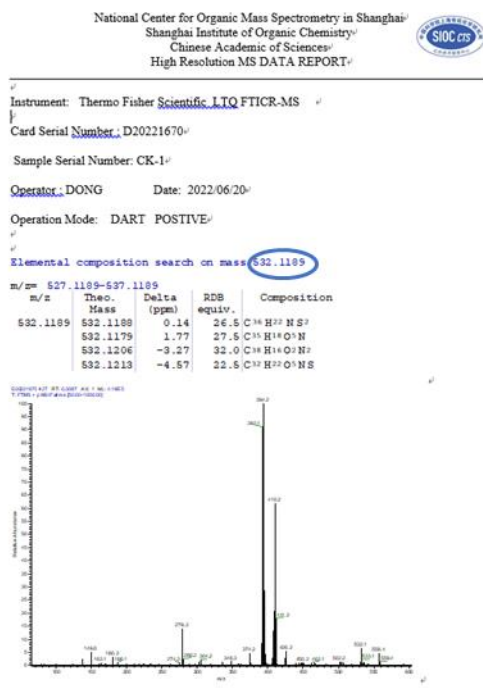

Figure S22 HRMS spectra of PTBT-NPh<sub>2</sub>

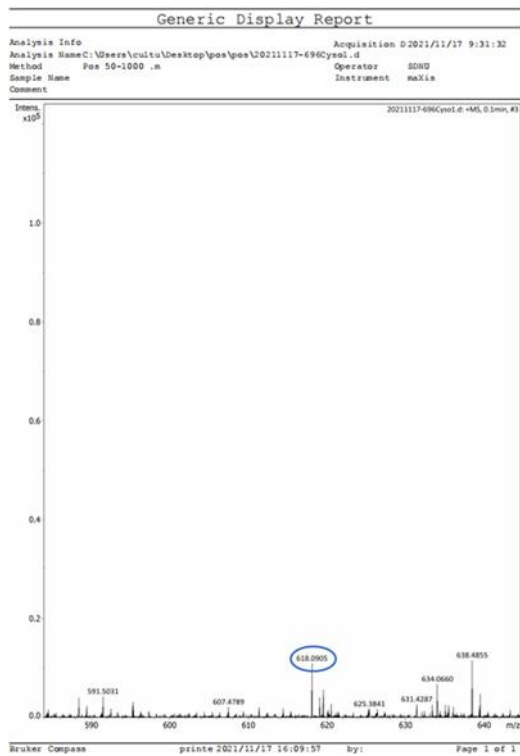

**Figure S23** HRMS spectra of **PTBT-O-NPh<sub>2</sub>**

#### 4. X-Ray Crystal Structure Determination

**Table S2** Crystal data and structure refinement for **PTBT-H**, **PTBT-NPh<sub>2</sub>** and **PTBT-O-NPh<sub>2</sub>**

| Identification code                         | <b>PTBT-H</b>                                                 | <b>PTBT-NPh<sub>2</sub></b>                                   | <b>PTBT-O-NPh<sub>2</sub></b>                                  |
|---------------------------------------------|---------------------------------------------------------------|---------------------------------------------------------------|----------------------------------------------------------------|
| Empirical formula                           | C <sub>24</sub> H <sub>12</sub> S <sub>2</sub>                | C <sub>36</sub> H <sub>21</sub> NS <sub>2</sub>               | C <sub>36</sub> H <sub>21</sub> NO <sub>4</sub> S <sub>2</sub> |
| Formula weight                              | 364.46                                                        | 531.66                                                        | 595.66                                                         |
| Temperature/K                               | 296.0                                                         | 173.00(2)                                                     | 173.00(2)                                                      |
| Crystal system                              | orthorhombic                                                  | triclinic                                                     | triclinic                                                      |
| Space group                                 | Pca2 <sub>1</sub>                                             | P-1                                                           | P-1                                                            |
| a/Å                                         | 24.0909(15)                                                   | 10.9728(4)                                                    | 12.0120(3)                                                     |
| b/Å                                         | 3.9416(3)                                                     | 12.1051(3)                                                    | 14.3623(4)                                                     |
| c/Å                                         | 33.935(2)                                                     | 20.2333(7)                                                    | 16.3253(3)                                                     |
| α/°                                         | 90                                                            | 85.395(2)                                                     | 94.8658(19)                                                    |
| β/°                                         | 90                                                            | 77.868(3)                                                     | 93.9589(18)                                                    |
| γ/°                                         | 90                                                            | 79.709(2)                                                     | 103.292(3)                                                     |
| Volume/Å <sup>3</sup>                       | 3222.3(4)                                                     | 2582.68(14)                                                   | 2719.71(13)                                                    |
| Z                                           | 4                                                             | 4                                                             | 4                                                              |
| ρ <sub>calc</sub> /cm <sup>3</sup>          | 1.503                                                         | 1.367                                                         | 1.455                                                          |
| μ/mm <sup>-1</sup>                          | 3.005                                                         | 2.07                                                          | 2.144                                                          |
| F(000)                                      | 1504.0                                                        | 1104                                                          | 1232                                                           |
| Radiation                                   | CuKα (λ = 1.54178)                                            | Cu Kα (λ = 1.54184)                                           | Cu Kα (λ = 1.54184)                                            |
| 2θ range for data collection/°              | 7.338 to 133.22                                               | 7.43 to 134.126                                               | 6.358 to 134.16                                                |
| Index ranges                                | -28 ≤ h ≤ 27, -4 ≤ k ≤ 4, -40 ≤ l ≤ 39                        | -13 ≤ h ≤ 12, -12 ≤ k ≤ 14, -24 ≤ l ≤ 24                      | -14 ≤ h ≤ 14, -17 ≤ k ≤ 17, -19 ≤ l ≤ 15                       |
| Reflections collected                       | 16236                                                         | 26827                                                         | 27574                                                          |
| Independent reflections                     | 5623 [R <sub>int</sub> = 0.0661, R <sub>sigma</sub> = 0.0730] | 9096 [R <sub>int</sub> = 0.0473, R <sub>sigma</sub> = 0.0525] | 9572 [R <sub>int</sub> = 0.0664, R <sub>sigma</sub> = 0.0682]  |
| Data/restraints/parameters                  | 5623/1/469                                                    | 9096/0/703                                                    | 9572/72/775                                                    |
| Goodness-of-fit on F <sup>2</sup>           | 0.993                                                         | 1.05                                                          | 1.051                                                          |
| Final R indexes [I ≥ 2σ (I)]                | R <sub>1</sub> = 0.0454, wR <sub>2</sub> = 0.0976             | R <sub>1</sub> = 0.0362, wR <sub>2</sub> = 0.0921             | R <sub>1</sub> = 0.0587, wR <sub>2</sub> = 0.1579              |
| Final R indexes [all data]                  | R <sub>1</sub> = 0.0685, wR <sub>2</sub> = 0.1077             | R <sub>1</sub> = 0.0472, wR <sub>2</sub> = 0.0968             | R <sub>1</sub> = 0.0707, wR <sub>2</sub> = 0.1647              |
| Largest diff. peak/hole / e Å <sup>-3</sup> | 0.21/-0.27                                                    | 0.26/-0.30                                                    | 0.45/-0.40                                                     |

**Table S3 Bond Lengths for PTBT-H**

| Atom | Atom | Length/Å | Atom | Atom | Length/Å |
|------|------|----------|------|------|----------|
| S2   | C19  | 1.760(6) | C7   | C8   | 1.406(8) |
| S2   | C2   | 1.752(6) | C7   | C18  | 1.425(8) |
| S1   | C1   | 1.723(6) | C8   | C9   | 1.365(9) |
| S1   | C16  | 1.751(6) | C9   | C10  | 1.382(9) |
| C23  | C24  | 1.373(9) | C1   | C20  | 1.437(8) |
| C23  | C22  | 1.380(9) | C16  | C15  | 1.377(8) |
| C24  | C19  | 1.393(8) | C15  | C14  | 1.389(8) |
| C19  | C20  | 1.391(8) | C14  | C13  | 1.416(8) |
| C2   | C3   | 1.433(8) | C14  | C17  | 1.436(8) |
| C2   | C1   | 1.375(8) | C13  | C12  | 1.352(9) |
| C3   | C4   | 1.403(8) | C12  | C11  | 1.441(8) |
| C3   | C16  | 1.416(7) | C11  | C18  | 1.406(8) |
| C4   | C5   | 1.444(7) | C11  | C10  | 1.400(8) |
| C4   | C17  | 1.415(8) | C18  | C17  | 1.427(8) |
| C5   | C6   | 1.346(8) | C20  | C21  | 1.398(8) |
| C6   | C7   | 1.416(8) | C21  | C22  | 1.369(9) |

**Table S4 Bond Angles for PTBT-H**

| Atom | Atom | Atom | Angle/°  | Atom | Atom | Atom | Angle/°  |
|------|------|------|----------|------|------|------|----------|
| C2   | S2   | C19  | 90.6(3)  | C18  | C11  | C12  | 119.7(5) |
| C1   | S1   | C16  | 90.7(3)  | C10  | C11  | C18  | 119.2(6) |
| C4   | C3   | C2   | 131.7(5) | C10  | C11  | C12  | 121.1(6) |
| C4   | C3   | C16  | 118.9(5) | C22  | C21  | C20  | 118.1(6) |
| C16  | C3   | C2   | 109.3(5) | C15  | C14  | C13  | 122.3(5) |
| C16  | C15  | C14  | 120.6(5) | C15  | C14  | C17  | 118.7(5) |
| C9   | C8   | C7   | 121.1(6) | C13  | C14  | C17  | 119.0(6) |
| C12  | C13  | C14  | 122.7(6) | C13  | C12  | C11  | 119.5(6) |
| C3   | C2   | S2   | 134.2(4) | C24  | C19  | S2   | 126.0(5) |
| C1   | C2   | S2   | 111.4(4) | C20  | C19  | S2   | 112.9(4) |
| C1   | C2   | C3   | 114.4(5) | C20  | C19  | C24  | 121.0(6) |
| C6   | C5   | C4   | 120.8(6) | C2   | C1   | S1   | 112.6(4) |
| C23  | C24  | C19  | 118.2(6) | C2   | C1   | C20  | 114.6(5) |
| C4   | C17  | C18  | 120.8(5) | C20  | C1   | S1   | 132.8(5) |
| C4   | C17  | C14  | 120.6(5) | C24  | C23  | C22  | 120.7(6) |
| C18  | C17  | C14  | 118.5(5) | C3   | C16  | S1   | 112.9(4) |
| C3   | C4   | C5   | 122.8(5) | C15  | C16  | S1   | 125.2(5) |
| C3   | C4   | C17  | 119.3(5) | C15  | C16  | C3   | 121.9(6) |
| C17  | C4   | C5   | 117.9(5) | C8   | C7   | C18  | 118.1(6) |
| C11  | C18  | C17  | 120.5(5) | C8   | C7   | C6   | 123.5(6) |
| C11  | C18  | C7   | 120.1(5) | C6   | C7   | C18  | 118.3(5) |
| C7   | C18  | C17  | 119.4(5) | C9   | C10  | C11  | 120.4(6) |
| C21  | C20  | C1   | 129.6(6) | C5   | C6   | C7   | 122.8(6) |
| C19  | C20  | C21  | 120.0(6) | C8   | C9   | C10  | 121.1(6) |
| C19  | C20  | C1   | 110.4(5) |      |      |      |          |



**Table S5** Torsion Angles for **PTBT-H**

| A   | B   | C   | D   | Angle/°   | A   | B   | C   | D   | Angle/°   |
|-----|-----|-----|-----|-----------|-----|-----|-----|-----|-----------|
| S2  | C2  | C1  | S1  | -179.8(3) | C18 | C7  | C6  | C5  | -0.3(9)   |
| S2  | C2  | C1  | C20 | -0.3(6)   | C11 | C18 | C7  | C8  | -0.3(8)   |
| S2  | C19 | C20 | C21 | 179.2(4)  | C11 | C18 | C7  | C6  | -179.4(5) |
| S2  | C19 | C20 | C1  | -0.8(6)   | C11 | C10 | C9  | C8  | 1.3(10)   |
| S1  | C1  | C20 | C21 | 0.1(10)   | C14 | C15 | C16 | S1  | 178.7(5)  |
| S1  | C1  | C20 | C19 | -179.9(5) | C14 | C15 | C16 | C3  | -0.6(9)   |
| C3  | C2  | C1  | S1  | 0.7(6)    | C14 | C13 | C12 | C11 | 0.7(9)    |
| C3  | C2  | C1  | C20 | -179.8(5) | C14 | C17 | C4  | C3  | 0.1(8)    |
| C8  | C7  | C6  | C5  | -179.4(6) | C14 | C17 | C4  | C5  | 179.3(5)  |
| C2  | S2  | C19 | C24 | 179.6(5)  | C14 | C17 | C18 | C11 | 0.1(8)    |
| C2  | S2  | C19 | C20 | 0.6(5)    | C14 | C17 | C18 | C7  | -179.4(5) |
| C2  | C3  | C4  | C5  | 1.2(10)   | C12 | C13 | C14 | C15 | -179.0(6) |
| C2  | C3  | C4  | C17 | -179.7(6) | C12 | C13 | C14 | C17 | 0.3(9)    |
| C2  | C3  | C16 | S1  | 0.5(6)    | C12 | C11 | C10 | C9  | 179.2(6)  |
| C2  | C3  | C16 | C15 | 179.8(5)  | C19 | S2  | C2  | C3  | 179.2(6)  |
| C2  | C1  | C20 | C21 | -179.3(6) | C19 | S2  | C2  | C1  | -0.2(4)   |
| C2  | C1  | C20 | C19 | 0.7(7)    | C19 | C24 | C23 | C22 | 1.4(9)    |
| C24 | C19 | C20 | C21 | 0.1(9)    | C1  | S1  | C16 | C3  | -0.1(5)   |
| C24 | C19 | C20 | C1  | -179.9(5) | C1  | S1  | C16 | C15 | -179.4(6) |
| C24 | C23 | C22 | C21 | -0.9(10)  | C23 | C24 | C19 | S2  | -180.0(5) |
| C17 | C18 | C11 | C12 | 0.9(8)    | C23 | C24 | C19 | C20 | -1.0(9)   |
| C17 | C18 | C11 | C10 | -179.5(5) | C16 | S1  | C1  | C2  | -0.3(4)   |
| C17 | C18 | C7  | C8  | 179.2(6)  | C16 | S1  | C1  | C20 | -179.7(6) |
| C17 | C18 | C7  | C6  | 0.1(8)    | C16 | C3  | C2  | S2  | 179.9(5)  |
| C4  | C3  | C2  | S2  | 0.1(10)   | C16 | C3  | C2  | C1  | -0.8(7)   |
| C4  | C3  | C2  | C1  | 179.5(6)  | C16 | C3  | C4  | C5  | -178.6(5) |
| C4  | C3  | C16 | S1  | -179.7(4) | C16 | C3  | C4  | C17 | 0.6(8)    |
| C4  | C3  | C16 | C15 | -0.3(8)   | C16 | C15 | C14 | C13 | -179.5(6) |
| C4  | C5  | C6  | C7  | 0.3(10)   | C16 | C15 | C14 | C17 | 1.2(9)    |
| C4  | C17 | C18 | C11 | 179.7(5)  | C22 | C21 | C20 | C19 | 0.4(9)    |
| C4  | C17 | C18 | C7  | 0.2(8)    | C22 | C21 | C20 | C1  | -179.5(6) |
| C4  | C17 | C14 | C15 | -1.0(8)   | C7  | C8  | C9  | C10 | -1.5(10)  |
| C4  | C17 | C14 | C13 | 179.7(5)  | C7  | C18 | C11 | C12 | -179.6(5) |
| C18 | C17 | C4  | C3  | -179.5(5) | C7  | C18 | C11 | C10 | 0.0(8)    |
| C18 | C17 | C4  | C5  | -0.3(8)   | C10 | C11 | C12 | C13 | 179.1(6)  |
| C18 | C17 | C14 | C15 | 178.6(5)  | C6  | C5  | C4  | C3  | 179.2(6)  |
| C18 | C17 | C14 | C13 | -0.7(8)   | C6  | C5  | C4  | C17 | 0.0(8)    |
| C18 | C11 | C12 | C13 | -1.3(9)   | C9  | C8  | C7  | C18 | 1.0(9)    |
| C18 | C11 | C10 | C9  | -0.5(9)   | C9  | C8  | C7  | C6  | -179.9(6) |
| C20 | C21 | C22 | C23 | 0.0(9)    |     |     |     |     |           |

**Table S6 Bond Lengths for PTBT-NPh<sub>2</sub>**

| <b>Atom</b> | <b>Atom</b> | <b>Length/Å</b> | <b>Atom</b> | <b>Atom</b> | <b>Length/Å</b> |
|-------------|-------------|-----------------|-------------|-------------|-----------------|
| S4          | C38         | 1.7375(16)      | C65         | C64         | 1.378(4)        |
| S4          | C55         | 1.7533(17)      | C3          | C4          | 1.414(2)        |
| S3          | C37         | 1.7278(17)      | C3          | C16         | 1.416(2)        |
| S3          | C52         | 1.7477(17)      | C23         | C24         | 1.389(3)        |
| S1          | C1          | 1.7396(16)      | C23         | C22         | 1.403(3)        |
| S1          | C16         | 1.7522(17)      | C38         | C39         | 1.432(2)        |
| S2          | C2          | 1.7472(15)      | C67         | C68         | 1.381(3)        |
| S2          | C19         | 1.7480(17)      | C67         | C72         | 1.382(3)        |
| N2          | C67         | 1.431(2)        | C52         | C39         | 1.414(2)        |
| N2          | C61         | 1.415(2)        | C55         | C60         | 1.395(2)        |
| N2          | C59         | 1.420(2)        | C55         | C56         | 1.404(2)        |
| N1          | C23         | 1.431(2)        | C41         | C40         | 1.424(2)        |
| N1          | C25         | 1.406(2)        | C62         | C61         | 1.389(3)        |
| N1          | C31         | 1.424(2)        | C15         | C14         | 1.391(2)        |
| C51         | C50         | 1.388(3)        | C15         | C16         | 1.390(2)        |
| C51         | C52         | 1.392(2)        | C39         | C40         | 1.418(2)        |
| C63         | C62         | 1.381(3)        | C6          | C5          | 1.353(3)        |
| C63         | C64         | 1.368(4)        | C6          | C7          | 1.433(2)        |
| C71         | C70         | 1.376(3)        | C13         | C14         | 1.438(2)        |
| C71         | C72         | 1.380(3)        | C13         | C12         | 1.348(3)        |
| C54         | C53         | 1.427(2)        | C18         | C7          | 1.423(2)        |
| C54         | C43         | 1.414(2)        | C18         | C17         | 1.428(2)        |
| C54         | C47         | 1.426(2)        | C25         | C26         | 1.398(2)        |
| C10         | C11         | 1.395(3)        | C25         | C30         | 1.400(2)        |
| C10         | C9          | 1.388(3)        | C32         | C31         | 1.386(3)        |
| C37         | C38         | 1.374(2)        | C19         | C20         | 1.416(2)        |
| C37         | C56         | 1.429(2)        | C19         | C24         | 1.391(2)        |
| C42         | C41         | 1.356(2)        | C35         | C36         | 1.388(3)        |
| C42         | C43         | 1.437(2)        | C35         | C34         | 1.377(3)        |
| C53         | C50         | 1.433(2)        | C57         | C56         | 1.403(2)        |
| C53         | C40         | 1.427(2)        | C36         | C31         | 1.392(3)        |
| C48         | C49         | 1.351(3)        | C20         | C21         | 1.400(2)        |
| C48         | C47         | 1.435(3)        | C20         | C1          | 1.431(2)        |
| C11         | C18         | 1.428(2)        | C60         | C59         | 1.390(2)        |
| C11         | C12         | 1.439(3)        | C14         | C17         | 1.428(2)        |
| C2          | C3          | 1.435(2)        | C9          | C8          | 1.382(3)        |
| C2          | C1          | 1.365(2)        | C21         | C22         | 1.378(2)        |
| C45         | C44         | 1.384(3)        | C44         | C43         | 1.406(2)        |
| C45         | C46         | 1.381(3)        | C61         | C66         | 1.389(3)        |
| C27         | C26         | 1.384(3)        | C8          | C7          | 1.403(3)        |
| C27         | C28         | 1.385(3)        | C46         | C47         | 1.396(3)        |
| C50         | C49         | 1.442(2)        | C5          | C4          | 1.430(2)        |

|            |     |          |     |     |          |
|------------|-----|----------|-----|-----|----------|
| <b>C33</b> | C32 | 1.394(3) | C68 | C69 | 1.390(3) |
| <b>C33</b> | C34 | 1.380(3) | C30 | C29 | 1.386(3) |
| <b>C58</b> | C57 | 1.371(3) | C4  | C17 | 1.425(2) |
| <b>C58</b> | C59 | 1.408(3) | C70 | C69 | 1.372(3) |
| <b>C65</b> | C66 | 1.397(3) | C29 | C28 | 1.381(3) |

**Table S7** Bond Angles for **PTBT-NPh<sub>2</sub>**

| Atom | Atom | Atom | Angle/°    | Atom | Atom | Atom | Angle/°    |
|------|------|------|------------|------|------|------|------------|
| C38  | S4   | C55  | 91.04(8)   | C30  | C25  | N1   | 121.15(15) |
| C37  | S3   | C52  | 90.53(8)   | C31  | C32  | C33  | 119.69(17) |
| C1   | S1   | C16  | 90.19(8)   | C20  | C19  | S2   | 112.59(12) |
| C2   | S2   | C19  | 90.81(8)   | C24  | C19  | S2   | 125.58(13) |
| C61  | N2   | C67  | 118.21(14) | C24  | C19  | C20  | 121.83(15) |
| C61  | N2   | C59  | 121.08(15) | C34  | C35  | C36  | 120.33(18) |
| C59  | N2   | C67  | 118.56(14) | C58  | C57  | C56  | 119.60(16) |
| C25  | N1   | C23  | 119.51(14) | C35  | C36  | C31  | 119.97(18) |
| C25  | N1   | C31  | 120.53(13) | C41  | C40  | C53  | 118.64(14) |
| C31  | N1   | C23  | 119.96(14) | C39  | C40  | C53  | 118.11(14) |
| C50  | C51  | C52  | 119.33(16) | C39  | C40  | C41  | 123.25(15) |
| C64  | C63  | C62  | 120.9(2)   | C19  | C20  | C1   | 109.79(15) |
| C70  | C71  | C72  | 120.52(19) | C21  | C20  | C19  | 118.77(15) |
| C43  | C54  | C53  | 120.47(15) | C21  | C20  | C1   | 131.44(15) |
| C43  | C54  | C47  | 119.44(15) | C59  | C60  | C55  | 118.15(16) |
| C47  | C54  | C53  | 120.09(16) | C15  | C14  | C13  | 121.22(15) |
| C9   | C10  | C11  | 121.06(17) | C15  | C14  | C17  | 120.00(14) |
| C38  | C37  | S3   | 112.84(12) | C17  | C14  | C13  | 118.77(15) |
| C38  | C37  | C56  | 114.56(15) | C27  | C26  | C25  | 120.73(16) |
| C56  | C37  | S3   | 132.58(13) | C8   | C9   | C10  | 120.49(18) |
| C41  | C42  | C43  | 121.01(16) | C23  | C24  | C19  | 118.08(15) |
| C54  | C53  | C50  | 119.76(15) | C22  | C21  | C20  | 119.46(16) |
| C54  | C53  | C40  | 119.51(15) | C45  | C44  | C43  | 120.31(17) |
| C40  | C53  | C50  | 120.74(15) | C62  | C61  | N2   | 121.78(17) |
| C49  | C48  | C47  | 121.70(16) | C66  | C61  | N2   | 119.27(18) |
| C10  | C11  | C18  | 119.11(17) | C66  | C61  | C62  | 118.95(17) |
| C10  | C11  | C12  | 122.67(16) | C55  | C56  | C37  | 110.39(15) |
| C18  | C11  | C12  | 118.21(16) | C57  | C56  | C37  | 131.10(16) |
| C3   | C2   | S2   | 133.90(13) | C57  | C56  | C55  | 118.50(15) |
| C1   | C2   | S2   | 111.79(12) | C9   | C8   | C7   | 120.73(17) |
| C1   | C2   | C3   | 114.27(14) | C45  | C46  | C47  | 121.34(16) |
| C46  | C45  | C44  | 120.47(16) | C61  | C66  | C65  | 119.6(2)   |
| C26  | C27  | C28  | 120.38(16) | C6   | C5   | C4   | 121.52(15) |
| C51  | C50  | C53  | 120.02(15) | C67  | C68  | C69  | 120.42(19) |
| C51  | C50  | C49  | 121.42(16) | C18  | C7   | C6   | 118.22(16) |

|     |     |     |            |     |     |     |            |
|-----|-----|-----|------------|-----|-----|-----|------------|
| C53 | C50 | C49 | 118.56(15) | C8  | C7  | C6  | 122.46(16) |
| C34 | C33 | C32 | 120.43(18) | C8  | C7  | C18 | 119.31(16) |
| C57 | C58 | C59 | 121.50(16) | C2  | C1  | S1  | 112.88(12) |
| C64 | C65 | C66 | 120.7(2)   | C2  | C1  | C20 | 114.97(14) |
| C4  | C3  | C2  | 131.02(15) | C20 | C1  | S1  | 132.14(13) |
| C4  | C3  | C16 | 119.34(14) | C29 | C30 | C25 | 119.97(16) |
| C16 | C3  | C2  | 109.61(14) | C3  | C4  | C5  | 123.09(14) |
| C24 | C23 | N1  | 119.44(15) | C3  | C4  | C17 | 118.32(15) |
| C24 | C23 | C22 | 120.71(15) | C17 | C4  | C5  | 118.59(15) |
| C22 | C23 | N1  | 119.86(16) | C54 | C43 | C42 | 118.57(15) |
| C37 | C38 | S4  | 111.68(12) | C44 | C43 | C54 | 119.60(16) |
| C37 | C38 | C39 | 113.94(15) | C44 | C43 | C42 | 121.82(16) |
| C39 | C38 | S4  | 134.38(13) | C32 | C31 | N1  | 120.39(16) |
| C68 | C67 | N2  | 120.65(17) | C32 | C31 | C36 | 119.65(16) |
| C68 | C67 | C72 | 119.26(18) | C36 | C31 | N1  | 119.93(16) |
| C72 | C67 | N2  | 120.07(17) | C3  | C16 | S1  | 113.00(12) |
| C51 | C52 | S3  | 124.80(13) | C15 | C16 | S1  | 124.65(13) |
| C51 | C52 | C39 | 122.28(15) | C15 | C16 | C3  | 122.32(15) |
| C39 | C52 | S3  | 112.91(12) | C21 | C22 | C23 | 121.15(16) |
| C60 | C55 | S4  | 125.47(13) | C54 | C47 | C48 | 118.63(16) |
| C60 | C55 | C56 | 122.22(15) | C46 | C47 | C54 | 118.84(17) |
| C56 | C55 | S4  | 112.30(12) | C46 | C47 | C48 | 122.53(16) |
| C42 | C41 | C40 | 121.80(15) | C69 | C70 | C71 | 119.85(19) |
| C63 | C62 | C61 | 120.4(2)   | C18 | C17 | C14 | 119.49(14) |
| C16 | C15 | C14 | 119.20(15) | C4  | C17 | C18 | 119.73(15) |
| C48 | C49 | C50 | 121.27(17) | C4  | C17 | C14 | 120.77(15) |
| C52 | C39 | C38 | 109.76(14) | C35 | C34 | C33 | 119.86(17) |
| C52 | C39 | C40 | 119.52(14) | C28 | C29 | C30 | 121.15(16) |
| C40 | C39 | C38 | 130.71(15) | C63 | C64 | C65 | 119.3(2)   |
| C5  | C6  | C7  | 121.62(16) | C29 | C28 | C27 | 119.24(16) |
| C12 | C13 | C14 | 121.49(16) | C71 | C72 | C67 | 120.07(19) |
| C7  | C18 | C11 | 119.30(16) | C13 | C12 | C11 | 121.63(15) |
| C7  | C18 | C17 | 120.30(15) | C70 | C69 | C68 | 119.8(2)   |
| C17 | C18 | C11 | 120.41(15) | C58 | C59 | N2  | 119.68(16) |
| C26 | C25 | N1  | 120.33(15) | C60 | C59 | N2  | 120.39(16) |
| C26 | C25 | C30 | 118.52(15) | C60 | C59 | C58 | 119.91(16) |

**Table S8** Torsion Angles for **PTBT-NPh<sub>2</sub>**

| A  | B   | C   | D   | Angle/°     | A   | B   | C   | D   | Angle/°     |
|----|-----|-----|-----|-------------|-----|-----|-----|-----|-------------|
| S4 | C38 | C39 | C52 | -177.00(13) | C49 | C48 | C47 | C46 | 179.07(17)  |
| S4 | C38 | C39 | C40 | 4.6(3)      | C6  | C5  | C4  | C3  | -179.66(16) |
| S4 | C55 | C60 | C59 | -178.61(13) | C6  | C5  | C4  | C17 | 0.7(2)      |
| S4 | C55 | C56 | C37 | -1.13(18)   | C13 | C14 | C17 | C18 | 0.1(2)      |
| S4 | C55 | C56 | C57 | 177.62(13)  | C13 | C14 | C17 | C4  | 179.02(14)  |

|     |     |     |     |             |     |     |     |     |             |
|-----|-----|-----|-----|-------------|-----|-----|-----|-----|-------------|
| S3  | C37 | C38 | S4  | 177.37(8)   | C18 | C11 | C12 | C13 | 0.6(3)      |
| S3  | C37 | C38 | C39 | -1.70(18)   | C25 | N1  | C23 | C24 | -124.86(18) |
| S3  | C37 | C56 | C55 | -176.86(13) | C25 | N1  | C23 | C22 | 54.7(2)     |
| S3  | C37 | C56 | C57 | 4.6(3)      | C25 | N1  | C31 | C32 | -131.30(18) |
| S3  | C52 | C39 | C38 | -1.13(17)   | C25 | N1  | C31 | C36 | 46.8(2)     |
| S3  | C52 | C39 | C40 | 177.51(12)  | C25 | C30 | C29 | C28 | -0.5(3)     |
| S2  | C2  | C3  | C4  | 6.7(3)      | C32 | C33 | C34 | C35 | 1.8(3)      |
| S2  | C2  | C3  | C16 | -175.17(13) | C19 | S2  | C2  | C3  | 179.56(17)  |
| S2  | C2  | C1  | S1  | 176.62(8)   | C19 | S2  | C2  | C1  | 2.00(13)    |
| S2  | C2  | C1  | C20 | -2.44(19)   | C19 | C20 | C21 | C22 | -0.1(3)     |
| S2  | C19 | C20 | C21 | -179.51(13) | C19 | C20 | C1  | S1  | -177.25(13) |
| S2  | C19 | C20 | C1  | -0.01(18)   | C19 | C20 | C1  | C2  | 1.6(2)      |
| S2  | C19 | C24 | C23 | 179.61(13)  | C35 | C36 | C31 | N1  | -175.81(16) |
| N2  | C67 | C68 | C69 | 179.4(2)    | C35 | C36 | C31 | C32 | 2.3(3)      |
| N2  | C67 | C72 | C71 | 179.94(17)  | C57 | C58 | C59 | N2  | 178.39(18)  |
| N2  | C61 | C66 | C65 | -179.56(19) | C57 | C58 | C59 | C60 | -3.0(3)     |
| N1  | C23 | C24 | C19 | 179.38(15)  | C36 | C35 | C34 | C33 | -2.1(3)     |
| N1  | C23 | C22 | C21 | -179.20(16) | C40 | C53 | C50 | C51 | -0.4(2)     |
| N1  | C25 | C26 | C27 | -178.93(16) | C40 | C53 | C50 | C49 | 179.83(15)  |
| N1  | C25 | C30 | C29 | 179.79(16)  | C20 | C19 | C24 | C23 | -0.1(3)     |
| C51 | C50 | C49 | C48 | -178.99(16) | C20 | C21 | C22 | C23 | -0.2(3)     |
| C51 | C52 | C39 | C38 | -179.90(15) | C60 | C55 | C56 | C37 | 177.83(15)  |
| C51 | C52 | C39 | C40 | -1.3(2)     | C60 | C55 | C56 | C57 | -3.4(2)     |
| C63 | C62 | C61 | N2  | 178.7(2)    | C14 | C15 | C16 | S1  | -176.94(12) |
| C63 | C62 | C61 | C66 | -1.7(3)     | C14 | C15 | C16 | C3  | 1.3(2)      |
| C71 | C70 | C69 | C68 | 1.5(3)      | C14 | C13 | C12 | C11 | -0.6(3)     |
| C54 | C53 | C50 | C51 | 179.15(15)  | C26 | C27 | C28 | C29 | 0.2(3)      |
| C54 | C53 | C50 | C49 | -0.6(2)     | C26 | C25 | C30 | C29 | -0.4(2)     |
| C54 | C53 | C40 | C41 | -0.2(2)     | C9  | C10 | C11 | C18 | 0.0(3)      |
| C54 | C53 | C40 | C39 | -179.20(13) | C9  | C10 | C11 | C12 | 179.32(18)  |
| C10 | C11 | C18 | C7  | -0.3(2)     | C9  | C8  | C7  | C6  | 179.42(17)  |
| C10 | C11 | C18 | C17 | 179.05(16)  | C9  | C8  | C7  | C18 | -0.8(3)     |
| C10 | C11 | C12 | C13 | -178.71(18) | C24 | C23 | C22 | C21 | 0.4(3)      |
| C10 | C9  | C8  | C7  | 0.6(3)      | C24 | C19 | C20 | C21 | 0.2(2)      |
| C37 | S3  | C52 | C51 | 178.93(15)  | C24 | C19 | C20 | C1  | 179.74(15)  |
| C37 | S3  | C52 | C39 | 0.19(12)    | C21 | C20 | C1  | S1  | 2.2(3)      |
| C37 | C38 | C39 | C52 | 1.80(19)    | C21 | C20 | C1  | C2  | -179.00(18) |
| C37 | C38 | C39 | C40 | -176.63(15) | C44 | C45 | C46 | C47 | -0.4(3)     |
| C42 | C41 | C40 | C53 | -0.3(2)     | C61 | N2  | C67 | C68 | -59.4(2)    |
| C42 | C41 | C40 | C39 | 178.66(15)  | C61 | N2  | C67 | C72 | 122.01(19)  |
| C53 | C54 | C43 | C42 | -0.3(2)     | C61 | N2  | C59 | C58 | -44.4(3)    |
| C53 | C54 | C43 | C44 | 178.80(15)  | C61 | N2  | C59 | C60 | 137.02(18)  |
| C53 | C54 | C47 | C48 | 0.3(2)      | C56 | C37 | C38 | S4  | -1.44(18)   |
| C53 | C54 | C47 | C46 | -178.96(14) | C56 | C37 | C38 | C39 | 179.48(14)  |

|     |     |     |     |             |     |     |     |     |             |
|-----|-----|-----|-----|-------------|-----|-----|-----|-----|-------------|
| C53 | C50 | C49 | C48 | 0.7(3)      | C56 | C55 | C60 | C59 | 2.6(3)      |
| C11 | C10 | C9  | C8  | -0.2(3)     | C46 | C45 | C44 | C43 | 0.2(3)      |
| C11 | C18 | C7  | C6  | -179.58(15) | C66 | C65 | C64 | C63 | -1.8(4)     |
| C11 | C18 | C7  | C8  | 0.7(2)      | C5  | C6  | C7  | C18 | -1.7(2)     |
| C11 | C18 | C17 | C14 | -0.1(2)     | C5  | C6  | C7  | C8  | 178.06(17)  |
| C11 | C18 | C17 | C4  | -178.96(15) | C5  | C4  | C17 | C18 | -1.3(2)     |
| C2  | S2  | C19 | C20 | -1.11(13)   | C5  | C4  | C17 | C14 | 179.84(14)  |
| C2  | S2  | C19 | C24 | 179.15(16)  | C68 | C67 | C72 | C71 | 1.3(3)      |
| C2  | C3  | C4  | C5  | -0.1(3)     | C7  | C6  | C5  | C4  | 0.8(3)      |
| C2  | C3  | C4  | C17 | 179.44(15)  | C7  | C18 | C17 | C14 | 179.24(14)  |
| C2  | C3  | C16 | S1  | -2.23(17)   | C7  | C18 | C17 | C4  | 0.4(2)      |
| C2  | C3  | C16 | C15 | 179.33(14)  | C1  | S1  | C16 | C3  | 1.27(12)    |
| C45 | C44 | C43 | C54 | 0.2(2)      | C1  | S1  | C16 | C15 | 179.67(15)  |
| C45 | C44 | C43 | C42 | 179.18(15)  | C1  | C2  | C3  | C4  | -175.81(16) |
| C45 | C46 | C47 | C54 | 0.2(2)      | C1  | C2  | C3  | C16 | 2.3(2)      |
| C45 | C46 | C47 | C48 | -179.05(16) | C1  | C20 | C21 | C22 | -179.44(17) |
| C50 | C51 | C52 | S3  | -177.41(12) | C30 | C25 | C26 | C27 | 1.3(3)      |
| C50 | C51 | C52 | C39 | 1.2(2)      | C30 | C29 | C28 | C27 | 0.7(3)      |
| C50 | C53 | C40 | C41 | 179.35(14)  | C4  | C3  | C16 | S1  | 176.18(12)  |
| C50 | C53 | C40 | C39 | 0.4(2)      | C4  | C3  | C16 | C15 | -2.3(2)     |
| C33 | C32 | C31 | N1  | 175.50(16)  | C43 | C54 | C53 | C50 | -179.11(14) |
| C33 | C32 | C31 | C36 | -2.6(3)     | C43 | C54 | C53 | C40 | 0.5(2)      |
| C58 | C57 | C56 | C37 | 179.45(18)  | C43 | C54 | C47 | C48 | 179.48(15)  |
| C58 | C57 | C56 | C55 | 1.0(3)      | C43 | C54 | C47 | C46 | 0.3(2)      |
| C3  | C2  | C1  | S1  | -1.45(19)   | C43 | C42 | C41 | C40 | 0.5(2)      |
| C3  | C2  | C1  | C20 | 179.48(14)  | C31 | N1  | C23 | C24 | 54.8(2)     |
| C3  | C4  | C17 | C18 | 179.10(14)  | C31 | N1  | C23 | C22 | -125.62(18) |
| C3  | C4  | C17 | C14 | 0.2(2)      | C31 | N1  | C25 | C26 | 30.1(3)     |
| C23 | N1  | C25 | C26 | -150.27(17) | C31 | N1  | C25 | C30 | -150.16(17) |
| C23 | N1  | C25 | C30 | 29.5(2)     | C16 | S1  | C1  | C2  | 0.11(13)    |
| C23 | N1  | C31 | C32 | 49.0(2)     | C16 | S1  | C1  | C20 | 178.96(17)  |
| C23 | N1  | C31 | C36 | -132.86(18) | C16 | C3  | C4  | C5  | -178.16(15) |
| C38 | S4  | C55 | C60 | -178.61(15) | C16 | C3  | C4  | C17 | 1.4(2)      |
| C38 | S4  | C55 | C56 | 0.31(13)    | C16 | C15 | C14 | C13 | -179.79(15) |
| C38 | C37 | C56 | C55 | 1.7(2)      | C16 | C15 | C14 | C17 | 0.4(2)      |
| C38 | C37 | C56 | C57 | -176.88(17) | C22 | C23 | C24 | C19 | -0.2(3)     |
| C38 | C39 | C40 | C53 | 178.75(15)  | C47 | C54 | C53 | C50 | 0.1(2)      |
| C38 | C39 | C40 | C41 | -0.2(3)     | C47 | C54 | C53 | C40 | 179.68(14)  |
| C67 | N2  | C61 | C62 | 139.43(19)  | C47 | C54 | C43 | C42 | -179.46(14) |
| C67 | N2  | C61 | C66 | -40.2(3)    | C47 | C54 | C43 | C44 | -0.4(2)     |
| C67 | N2  | C59 | C58 | 152.55(17)  | C47 | C48 | C49 | C50 | -0.4(3)     |
| C67 | N2  | C59 | C60 | -26.0(3)    | C70 | C71 | C72 | C67 | 0.8(3)      |
| C67 | C68 | C69 | C70 | 0.6(3)      | C17 | C18 | C7  | C6  | 1.1(2)      |
| C52 | S3  | C37 | C38 | 0.85(13)    | C17 | C18 | C7  | C8  | -178.65(15) |

|     |     |     |     |             |     |     |     |     |             |
|-----|-----|-----|-----|-------------|-----|-----|-----|-----|-------------|
| C52 | S3  | C37 | C56 | 179.39(17)  | C34 | C33 | C32 | C31 | 0.6(3)      |
| C52 | C51 | C50 | C53 | -0.4(2)     | C34 | C35 | C36 | C31 | 0.1(3)      |
| C52 | C51 | C50 | C49 | 179.38(15)  | C64 | C63 | C62 | C61 | 0.8(4)      |
| C52 | C39 | C40 | C53 | 0.4(2)      | C64 | C65 | C66 | C61 | 0.9(4)      |
| C52 | C39 | C40 | C41 | -178.48(14) | C28 | C27 | C26 | C25 | -1.2(3)     |
| C55 | S4  | C38 | C37 | 0.64(13)    | C72 | C71 | C70 | C69 | -2.2(3)     |
| C55 | S4  | C38 | C39 | 179.45(17)  | C72 | C67 | C68 | C69 | -2.0(3)     |
| C55 | C60 | C59 | N2  | 179.21(15)  | C12 | C11 | C18 | C7  | -179.61(15) |
| C55 | C60 | C59 | C58 | 0.6(3)      | C12 | C11 | C18 | C17 | -0.3(2)     |
| C41 | C42 | C43 | C54 | -0.2(2)     | C12 | C13 | C14 | C15 | -179.62(16) |
| C41 | C42 | C43 | C44 | -179.27(15) | C12 | C13 | C14 | C17 | 0.2(2)      |
| C62 | C63 | C64 | C65 | 0.9(4)      | C59 | N2  | C67 | C68 | 104.1(2)    |
| C62 | C61 | C66 | C65 | 0.8(3)      | C59 | N2  | C67 | C72 | -74.5(2)    |
| C15 | C14 | C17 | C18 | 179.94(15)  | C59 | N2  | C61 | C62 | -23.7(3)    |
| C15 | C14 | C17 | C4  | -1.2(2)     | C59 | N2  | C61 | C66 | 156.72(18)  |
| C49 | C48 | C47 | C54 | -0.1(2)     | C59 | C58 | C57 | C56 | 2.2(3)      |

**Table S9** Bond Lengths for **PTBT-O-NPh<sub>2</sub>**

| Atom | Atom | Length/Å | Atom | Atom | Length/Å |
|------|------|----------|------|------|----------|
| S4   | O7   | 1.431(2) | C58  | C59  | 1.412(5) |
| S4   | O8   | 1.429(3) | C58  | C57  | 1.381(5) |
| S4   | C55  | 1.786(3) | C67  | C72  | 1.370(5) |
| S4   | C38  | 1.787(3) | C67  | C68  | 1.377(5) |
| S1   | O1   | 1.431(3) | C36  | C35  | 1.391(5) |
| S1   | O2   | 1.427(3) | C36  | C31  | 1.380(5) |
| S1   | C1   | 1.774(3) | C26  | C27  | 1.382(5) |
| S1   | C16  | 1.788(3) | C60  | C59  | 1.418(4) |
| S2   | O4   | 1.424(3) | C50  | C49  | 1.439(5) |
| S2   | O3   | 1.433(3) | C50  | C51  | 1.401(5) |
| S2   | C2   | 1.779(3) | C22  | C21  | 1.387(5) |
| S2   | C19  | 1.774(3) | C14  | C13  | 1.428(4) |
| S3   | O5   | 1.430(3) | C10  | C11  | 1.397(5) |
| S3   | O6   | 1.432(3) | C40  | C41  | 1.433(5) |
| S3   | C52  | 1.773(3) | C52  | C51  | 1.366(5) |
| S3   | C37  | 1.766(3) | C30  | C29  | 1.389(5) |
| N2   | C67  | 1.441(4) | C56  | C37  | 1.450(5) |
| N2   | C59  | 1.385(4) | C56  | C57  | 1.391(5) |
| N2   | C61  | 1.436(4) | C38  | C37  | 1.339(5) |
| N1   | C23  | 1.386(4) | C54  | C47  | 1.429(5) |
| N1   | C25  | 1.436(4) | C54  | C43  | 1.416(5) |
| N1   | C31  | 1.439(4) | C70  | C71  | 1.386(6) |
| C23  | C22  | 1.412(5) | C70  | C69  | 1.376(6) |
| C23  | C24  | 1.413(5) | C11  | C18  | 1.430(5) |
| C25  | C26  | 1.387(5) | C11  | C12  | 1.434(5) |

|     |     |          |     |     |          |
|-----|-----|----------|-----|-----|----------|
| C25 | C30 | 1.379(5) | C19 | C24 | 1.367(4) |
| C34 | C35 | 1.367(5) | C49 | C48 | 1.344(6) |
| C34 | C33 | 1.383(5) | C71 | C72 | 1.379(5) |
| C55 | C60 | 1.366(4) | C48 | C47 | 1.425(6) |
| C55 | C56 | 1.398(5) | C4  | C3  | 1.398(5) |
| C2  | C1  | 1.345(5) | C4  | C5  | 1.431(5) |
| C2  | C3  | 1.463(4) | C45 | C44 | 1.380(6) |
| C17 | C14 | 1.421(5) | C45 | C46 | 1.374(6) |
| C17 | C18 | 1.418(5) | C44 | C43 | 1.403(5) |
| C17 | C4  | 1.437(4) | C31 | C32 | 1.384(5) |
| C15 | C14 | 1.417(5) | C13 | C12 | 1.347(5) |
| C15 | C16 | 1.367(4) | C47 | C46 | 1.404(6) |
| C7  | C18 | 1.417(5) | C61 | C66 | 1.384(5) |
| C7  | C8  | 1.400(5) | C61 | C62 | 1.388(5) |
| C7  | C6  | 1.439(5) | C68 | C69 | 1.390(6) |
| C9  | C10 | 1.371(6) | C66 | C65 | 1.379(5) |
| C9  | C8  | 1.392(5) | C63 | C62 | 1.386(5) |
| C39 | C40 | 1.403(5) | C63 | C64 | 1.378(6) |
| C39 | C52 | 1.409(5) | C41 | C42 | 1.354(5) |
| C39 | C38 | 1.459(4) | C29 | C28 | 1.373(6) |
| C20 | C1  | 1.455(4) | C33 | C32 | 1.377(5) |
| C20 | C19 | 1.393(4) | C16 | C3  | 1.404(4) |
| C20 | C21 | 1.394(5) | C42 | C43 | 1.429(5) |
| C53 | C50 | 1.419(5) | C5  | C6  | 1.349(5) |
| C53 | C40 | 1.442(4) | C64 | C65 | 1.381(6) |
| C53 | C54 | 1.426(5) | C28 | C27 | 1.382(6) |

**Table S10** Bond Angles for **PTBT-O-NPh<sub>2</sub>**

| Atom | Atom | Atom | Angle/°    | Atom | Atom | Atom | Angle/°  |
|------|------|------|------------|------|------|------|----------|
| O7   | S4   | C55  | 111.44(14) | C39  | C40  | C53  | 117.5(3) |
| O7   | S4   | C38  | 109.76(14) | C39  | C40  | C41  | 123.9(3) |
| O8   | S4   | O7   | 118.18(15) | C41  | C40  | C53  | 118.6(3) |
| O8   | S4   | C55  | 110.42(14) | C34  | C35  | C36  | 119.9(3) |
| O8   | S4   | C38  | 111.46(15) | C39  | C52  | S3   | 111.2(2) |
| C55  | S4   | C38  | 92.69(15)  | C51  | C52  | S3   | 124.7(3) |
| O1   | S1   | C1   | 110.55(15) | C51  | C52  | C39  | 124.1(3) |
| O1   | S1   | C16  | 110.00(15) | C25  | C30  | C29  | 119.6(3) |
| O2   | S1   | O1   | 118.16(16) | C55  | C56  | C37  | 110.4(3) |
| O2   | S1   | C1   | 110.92(15) | C57  | C56  | C55  | 117.5(3) |
| O2   | S1   | C16  | 112.13(16) | C57  | C56  | C37  | 132.1(3) |
| C1   | S1   | C16  | 92.04(15)  | C39  | C38  | S4   | 134.7(3) |
| O4   | S2   | O3   | 118.18(17) | C37  | C38  | S4   | 107.7(2) |
| O4   | S2   | C2   | 111.44(16) | C37  | C38  | C39  | 117.6(3) |
| O4   | S2   | C19  | 111.18(15) | C53  | C54  | C47  | 120.0(3) |



|     |     |     |            |     |     |     |          |
|-----|-----|-----|------------|-----|-----|-----|----------|
| O3  | S2  | C2  | 110.31(15) | C43 | C54 | C53 | 120.7(3) |
| O3  | S2  | C19 | 110.37(15) | C43 | C54 | C47 | 119.4(3) |
| C19 | S2  | C2  | 92.41(15)  | C69 | C70 | C71 | 119.9(4) |
| O5  | S3  | O6  | 117.47(16) | C10 | C11 | C18 | 118.9(3) |
| O5  | S3  | C52 | 111.17(15) | C10 | C11 | C12 | 122.9(3) |
| O5  | S3  | C37 | 110.32(16) | C18 | C11 | C12 | 118.2(3) |
| O6  | S3  | C52 | 111.65(16) | C20 | C19 | S2  | 111.0(2) |
| O6  | S3  | C37 | 111.22(15) | C24 | C19 | S2  | 124.2(2) |
| C37 | S3  | C52 | 92.19(15)  | C24 | C19 | C20 | 124.8(3) |
| C59 | N2  | C67 | 118.0(3)   | C48 | C49 | C50 | 121.2(4) |
| C59 | N2  | C61 | 123.4(3)   | C72 | C71 | C70 | 120.4(4) |
| C61 | N2  | C67 | 116.5(3)   | C49 | C48 | C47 | 121.7(3) |
| C23 | N1  | C25 | 121.7(3)   | C67 | C72 | C71 | 119.8(4) |
| C23 | N1  | C31 | 122.3(3)   | C17 | C18 | C11 | 120.2(3) |
| C25 | N1  | C31 | 115.9(2)   | C7  | C18 | C17 | 120.6(3) |
| N1  | C23 | C22 | 121.4(3)   | C7  | C18 | C11 | 119.2(3) |
| N1  | C23 | C24 | 119.9(3)   | C56 | C37 | S3  | 131.6(3) |
| C22 | C23 | C24 | 118.7(3)   | C38 | C37 | S3  | 109.6(2) |
| C26 | C25 | N1  | 118.8(3)   | C38 | C37 | C56 | 118.8(3) |
| C30 | C25 | N1  | 120.9(3)   | C3  | C4  | C17 | 117.7(3) |
| C30 | C25 | C26 | 120.2(3)   | C3  | C4  | C5  | 123.7(3) |
| C35 | C34 | C33 | 120.4(3)   | C5  | C4  | C17 | 118.6(3) |
| C60 | C55 | S4  | 125.6(3)   | C46 | C45 | C44 | 120.7(4) |
| C60 | C55 | C56 | 124.3(3)   | C45 | C44 | C43 | 120.5(4) |
| C56 | C55 | S4  | 110.1(2)   | C36 | C31 | N1  | 119.4(3) |
| C1  | C2  | S2  | 108.4(2)   | C36 | C31 | C32 | 120.0(3) |
| C1  | C2  | C3  | 117.6(3)   | C32 | C31 | N1  | 120.7(3) |
| C3  | C2  | S2  | 133.9(3)   | C12 | C13 | C14 | 121.5(3) |
| C14 | C17 | C4  | 120.8(3)   | C48 | C47 | C54 | 118.6(3) |
| C18 | C17 | C14 | 119.6(3)   | C46 | C47 | C54 | 118.5(4) |
| C18 | C17 | C4  | 119.5(3)   | C46 | C47 | C48 | 122.9(3) |
| C16 | C15 | C14 | 117.2(3)   | C22 | C21 | C20 | 119.2(3) |
| C18 | C7  | C6  | 118.3(3)   | C58 | C57 | C56 | 120.0(3) |
| C8  | C7  | C18 | 119.7(3)   | C66 | C61 | N2  | 121.5(3) |
| C8  | C7  | C6  | 122.0(3)   | C66 | C61 | C62 | 119.5(3) |
| C10 | C9  | C8  | 120.8(4)   | C62 | C61 | N2  | 118.8(3) |
| C40 | C39 | C52 | 119.0(3)   | C67 | C68 | C69 | 120.4(4) |
| C40 | C39 | C38 | 131.6(3)   | C65 | C66 | C61 | 120.4(3) |
| C52 | C39 | C38 | 109.4(3)   | C70 | C69 | C68 | 119.3(4) |
| C19 | C20 | C1  | 110.1(3)   | C13 | C12 | C11 | 121.5(3) |
| C19 | C20 | C21 | 117.9(3)   | C64 | C63 | C62 | 120.5(4) |
| C21 | C20 | C1  | 132.1(3)   | C42 | C41 | C40 | 120.9(3) |
| C50 | C53 | C40 | 121.2(3)   | C28 | C29 | C30 | 120.4(4) |
| C50 | C53 | C54 | 119.5(3)   | C32 | C33 | C34 | 119.9(3) |

|     |     |     |          |     |     |     |          |
|-----|-----|-----|----------|-----|-----|-----|----------|
| C54 | C53 | C40 | 119.3(3) | C15 | C16 | S1  | 124.2(3) |
| C2  | C1  | S1  | 109.4(2) | C15 | C16 | C3  | 124.7(3) |
| C2  | C1  | C20 | 117.9(3) | C3  | C16 | S1  | 111.1(2) |
| C20 | C1  | S1  | 132.4(3) | C4  | C3  | C2  | 130.9(3) |
| C57 | C58 | C59 | 121.9(3) | C4  | C3  | C16 | 119.4(3) |
| C72 | C67 | N2  | 120.7(3) | C16 | C3  | C2  | 109.7(3) |
| C72 | C67 | C68 | 120.2(3) | C63 | C62 | C61 | 119.7(4) |
| C68 | C67 | N2  | 119.2(3) | C41 | C42 | C43 | 122.3(4) |
| C31 | C36 | C35 | 119.8(3) | C33 | C32 | C31 | 120.0(3) |
| C27 | C26 | C25 | 119.5(4) | C6  | C5  | C4  | 121.3(3) |
| C55 | C60 | C59 | 118.1(3) | C63 | C64 | C65 | 119.7(3) |
| C53 | C50 | C49 | 118.9(3) | C52 | C51 | C50 | 118.5(3) |
| C51 | C50 | C53 | 119.6(3) | C45 | C46 | C47 | 121.4(4) |
| C51 | C50 | C49 | 121.5(3) | C9  | C8  | C7  | 120.1(4) |
| N2  | C59 | C58 | 121.7(3) | C19 | C24 | C23 | 117.4(3) |
| N2  | C59 | C60 | 120.2(3) | C54 | C43 | C42 | 118.2(3) |
| C58 | C59 | C60 | 118.1(3) | C44 | C43 | C54 | 119.6(3) |
| C21 | C22 | C23 | 122.0(3) | C44 | C43 | C42 | 122.2(4) |
| C17 | C14 | C13 | 119.0(3) | C29 | C28 | C27 | 119.7(3) |
| C15 | C14 | C17 | 120.1(3) | C66 | C65 | C64 | 120.2(4) |
| C15 | C14 | C13 | 120.9(3) | C28 | C27 | C26 | 120.5(3) |
| C9  | C10 | C11 | 121.3(3) | C5  | C6  | C7  | 121.7(3) |

**Table S11** Torsion Angles for **PTBT-O-NPh<sub>2</sub>**

| A  | B   | C   | D   | Angle/°    | A   | B   | C   | D   | Angle/°   |
|----|-----|-----|-----|------------|-----|-----|-----|-----|-----------|
| S4 | C55 | C60 | C59 | -178.5(2)  | C14 | C17 | C4  | C3  | -0.9(4)   |
| S4 | C55 | C56 | C37 | 4.5(3)     | C14 | C17 | C4  | C5  | 177.7(3)  |
| S4 | C55 | C56 | C57 | -178.3(2)  | C14 | C15 | C16 | S1  | -178.2(2) |
| S4 | C38 | C37 | S3  | 178.01(16) | C14 | C15 | C16 | C3  | -0.3(5)   |
| S4 | C38 | C37 | C56 | -3.8(4)    | C14 | C13 | C12 | C11 | 1.4(5)    |
| S1 | C16 | C3  | C2  | -3.5(3)    | C10 | C9  | C8  | C7  | 1.2(6)    |
| S1 | C16 | C3  | C4  | 176.5(2)   | C10 | C11 | C18 | C17 | -179.0(3) |
| S2 | C2  | C1  | S1  | 177.73(16) | C10 | C11 | C18 | C7  | -1.0(5)   |
| S2 | C2  | C1  | C20 | 2.8(4)     | C10 | C11 | C12 | C13 | 178.0(3)  |
| S2 | C2  | C3  | C4  | 6.1(6)     | C40 | C39 | C52 | S3  | -178.4(2) |
| S2 | C2  | C3  | C16 | -173.9(3)  | C40 | C39 | C52 | C51 | -0.6(5)   |
| S2 | C19 | C24 | C23 | -179.9(2)  | C40 | C39 | C38 | S4  | 1.3(6)    |
| S3 | C52 | C51 | C50 | 178.5(2)   | C40 | C39 | C38 | C37 | -179.1(3) |
| O7 | S4  | C55 | C60 | -74.0(3)   | C40 | C53 | C50 | C49 | -179.9(3) |
| O7 | S4  | C55 | C56 | 106.8(2)   | C40 | C53 | C50 | C51 | 0.8(5)    |
| O7 | S4  | C38 | C39 | 70.9(4)    | C40 | C53 | C54 | C47 | -179.0(3) |
| O7 | S4  | C38 | C37 | -108.7(2)  | C40 | C53 | C54 | C43 | 0.3(5)    |
| O1 | S1  | C1  | C2  | 109.5(3)   | C40 | C41 | C42 | C43 | 0.4(6)    |
| O1 | S1  | C1  | C20 | -76.5(3)   | C35 | C34 | C33 | C32 | -2.3(6)   |

|     |     |     |     |           |     |     |     |     |           |
|-----|-----|-----|-----|-----------|-----|-----|-----|-----|-----------|
| O1  | S1  | C16 | C15 | 69.0(3)   | C35 | C36 | C31 | N1  | 177.6(3)  |
| O1  | S1  | C16 | C3  | -109.1(2) | C35 | C36 | C31 | C32 | -1.1(5)   |
| O4  | S2  | C2  | C1  | -117.6(3) | C52 | S3  | C37 | C56 | -174.9(3) |
| O4  | S2  | C2  | C3  | 58.1(4)   | C52 | S3  | C37 | C38 | 3.0(3)    |
| O4  | S2  | C19 | C20 | 118.0(2)  | C52 | C39 | C40 | C53 | 0.2(4)    |
| O4  | S2  | C19 | C24 | -62.4(3)  | C52 | C39 | C40 | C41 | 179.4(3)  |
| O8  | S4  | C55 | C60 | 59.4(3)   | C52 | C39 | C38 | S4  | 179.4(3)  |
| O8  | S4  | C55 | C56 | -119.8(2) | C52 | C39 | C38 | C37 | -1.0(4)   |
| O8  | S4  | C38 | C39 | -61.9(4)  | C30 | C25 | C26 | C27 | -1.0(5)   |
| O8  | S4  | C38 | C37 | 118.5(2)  | C30 | C29 | C28 | C27 | -2.0(6)   |
| O5  | S3  | C52 | C39 | 109.2(2)  | C56 | C55 | C60 | C59 | 0.5(5)    |
| O5  | S3  | C52 | C51 | -68.6(3)  | C38 | S4  | C55 | C60 | 173.5(3)  |
| O5  | S3  | C37 | C56 | 71.5(4)   | C38 | S4  | C55 | C56 | -5.7(3)   |
| O5  | S3  | C37 | C38 | -110.6(3) | C38 | C39 | C40 | C53 | 178.2(3)  |
| O3  | S2  | C2  | C1  | 109.1(3)  | C38 | C39 | C40 | C41 | -2.7(6)   |
| O3  | S2  | C2  | C3  | -75.2(4)  | C38 | C39 | C52 | S3  | 3.2(3)    |
| O3  | S2  | C19 | C20 | -108.8(2) | C38 | C39 | C52 | C51 | -179.0(3) |
| O3  | S2  | C19 | C24 | 70.8(3)   | C54 | C53 | C50 | C49 | 0.3(5)    |
| O6  | S3  | C52 | C39 | -117.5(2) | C54 | C53 | C50 | C51 | -179.0(3) |
| O6  | S3  | C52 | C51 | 64.7(3)   | C54 | C53 | C40 | C39 | 179.4(3)  |
| O6  | S3  | C37 | C56 | -60.7(4)  | C54 | C53 | C40 | C41 | 0.2(5)    |
| O6  | S3  | C37 | C38 | 117.2(3)  | C54 | C47 | C46 | C45 | 0.4(5)    |
| O2  | S1  | C1  | C2  | -117.4(3) | C70 | C71 | C72 | C67 | -0.6(6)   |
| O2  | S1  | C1  | C20 | 56.5(4)   | C19 | S2  | C2  | C1  | -3.7(3)   |
| O2  | S1  | C16 | C15 | -64.6(3)  | C19 | S2  | C2  | C3  | 172.0(3)  |
| O2  | S1  | C16 | C3  | 117.3(2)  | C19 | C20 | C1  | S1  | -173.5(3) |
| N2  | C67 | C72 | C71 | -177.6(3) | C19 | C20 | C1  | C2  | 0.1(4)    |
| N2  | C67 | C68 | C69 | 177.3(4)  | C19 | C20 | C21 | C22 | 1.5(5)    |
| N2  | C61 | C66 | C65 | 175.8(3)  | C49 | C50 | C51 | C52 | 179.6(3)  |
| N2  | C61 | C62 | C63 | -175.0(4) | C49 | C48 | C47 | C54 | 1.9(5)    |
| N1  | C23 | C22 | C21 | 176.3(3)  | C49 | C48 | C47 | C46 | -179.3(4) |
| N1  | C23 | C24 | C19 | -176.6(3) | C71 | C70 | C69 | C68 | -0.7(6)   |
| N1  | C25 | C26 | C27 | 175.4(3)  | C48 | C47 | C46 | C45 | -178.5(4) |
| N1  | C25 | C30 | C29 | -175.5(3) | C72 | C67 | C68 | C69 | -1.4(6)   |
| N1  | C31 | C32 | C33 | -178.9(3) | C18 | C17 | C14 | C15 | 178.9(3)  |
| C23 | N1  | C25 | C26 | 115.2(4)  | C18 | C17 | C14 | C13 | -0.8(5)   |
| C23 | N1  | C25 | C30 | -68.4(4)  | C18 | C17 | C4  | C3  | 179.3(3)  |
| C23 | N1  | C31 | C36 | 126.2(3)  | C18 | C17 | C4  | C5  | -2.2(5)   |
| C23 | N1  | C31 | C32 | -55.2(4)  | C18 | C7  | C8  | C9  | -0.9(5)   |
| C23 | C22 | C21 | C20 | 0.7(5)    | C18 | C7  | C6  | C5  | -1.2(5)   |
| C25 | N1  | C23 | C22 | -11.4(5)  | C18 | C11 | C12 | C13 | -1.7(5)   |
| C25 | N1  | C23 | C24 | 167.6(3)  | C37 | S3  | C52 | C39 | -3.6(3)   |
| C25 | N1  | C31 | C36 | -51.8(4)  | C37 | S3  | C52 | C51 | 178.6(3)  |
| C25 | N1  | C31 | C32 | 126.9(3)  | C37 | C56 | C57 | C58 | 174.3(3)  |

|     |     |     |     |           |     |     |     |     |           |
|-----|-----|-----|-----|-----------|-----|-----|-----|-----|-----------|
| C25 | C26 | C27 | C28 | -0.3(6)   | C4  | C17 | C14 | C15 | -1.0(5)   |
| C25 | C30 | C29 | C28 | 0.6(6)    | C4  | C17 | C14 | C13 | 179.3(3)  |
| C34 | C33 | C32 | C31 | 1.9(5)    | C4  | C17 | C18 | C7  | 2.4(5)    |
| C55 | S4  | C38 | C39 | -175.1(3) | C4  | C17 | C18 | C11 | -179.6(3) |
| C55 | S4  | C38 | C37 | 5.3(3)    | C4  | C5  | C6  | C7  | 1.4(6)    |
| C55 | C60 | C59 | N2  | 176.5(3)  | C45 | C44 | C43 | C54 | 0.6(6)    |
| C55 | C60 | C59 | C58 | -3.8(5)   | C45 | C44 | C43 | C42 | -178.7(4) |
| C55 | C56 | C37 | S3  | 177.3(3)  | C44 | C45 | C46 | C47 | -0.2(6)   |
| C55 | C56 | C37 | C38 | -0.5(4)   | C31 | N1  | C23 | C22 | 170.8(3)  |
| C55 | C56 | C57 | C58 | -2.2(5)   | C31 | N1  | C23 | C24 | -10.2(5)  |
| C2  | S2  | C19 | C20 | 3.9(3)    | C31 | N1  | C25 | C26 | -66.9(4)  |
| C2  | S2  | C19 | C24 | -176.5(3) | C31 | N1  | C25 | C30 | 109.5(4)  |
| C17 | C14 | C13 | C12 | -0.1(5)   | C31 | C36 | C35 | C34 | 0.7(5)    |
| C17 | C4  | C3  | C2  | -177.8(3) | C47 | C54 | C43 | C44 | -0.5(5)   |
| C17 | C4  | C3  | C16 | 2.1(5)    | C47 | C54 | C43 | C42 | 178.9(3)  |
| C17 | C4  | C5  | C6  | 0.3(5)    | C21 | C20 | C1  | S1  | 5.5(6)    |
| C15 | C14 | C13 | C12 | -179.8(3) | C21 | C20 | C1  | C2  | 179.0(3)  |
| C15 | C16 | C3  | C2  | 178.4(3)  | C21 | C20 | C19 | S2  | 177.9(2)  |
| C15 | C16 | C3  | C4  | -1.6(5)   | C21 | C20 | C19 | C24 | -1.7(5)   |
| C9  | C10 | C11 | C18 | 1.3(5)    | C57 | C58 | C59 | N2  | -176.2(3) |
| C9  | C10 | C11 | C12 | -178.4(3) | C57 | C58 | C59 | C60 | 4.1(5)    |
| C39 | C40 | C41 | C42 | -179.7(3) | C57 | C56 | C37 | S3  | 0.7(6)    |
| C39 | C52 | C51 | C50 | 1.0(5)    | C57 | C56 | C37 | C38 | -177.1(3) |
| C39 | C38 | C37 | S3  | -1.7(4)   | C61 | N2  | C67 | C72 | -100.5(4) |
| C39 | C38 | C37 | C56 | 176.5(3)  | C61 | N2  | C67 | C68 | 80.8(4)   |
| C20 | C19 | C24 | C23 | -0.3(5)   | C61 | N2  | C59 | C58 | 17.0(5)   |
| C53 | C50 | C49 | C48 | -0.3(5)   | C61 | N2  | C59 | C60 | -163.4(3) |
| C53 | C50 | C51 | C52 | -1.1(5)   | C61 | C66 | C65 | C64 | 0.1(6)    |
| C53 | C40 | C41 | C42 | -0.6(5)   | C68 | C67 | C72 | C71 | 1.1(5)    |
| C53 | C54 | C47 | C48 | -1.8(5)   | C66 | C61 | C62 | C63 | 1.3(6)    |
| C53 | C54 | C47 | C46 | 179.3(3)  | C69 | C70 | C71 | C72 | 0.4(6)    |
| C53 | C54 | C43 | C44 | -179.8(3) | C12 | C11 | C18 | C17 | 0.7(5)    |
| C53 | C54 | C43 | C42 | -0.5(5)   | C12 | C11 | C18 | C7  | 178.7(3)  |
| C1  | S1  | C16 | C15 | -178.2(3) | C63 | C64 | C65 | C66 | -0.6(6)   |
| C1  | S1  | C16 | C3  | 3.7(3)    | C41 | C42 | C43 | C54 | 0.1(6)    |
| C1  | C2  | C3  | C4  | -178.6(3) | C41 | C42 | C43 | C44 | 179.4(4)  |
| C1  | C2  | C3  | C16 | 1.5(4)    | C29 | C28 | C27 | C26 | 1.8(6)    |
| C1  | C20 | C19 | S2  | -2.9(3)   | C33 | C34 | C35 | C36 | 1.0(6)    |
| C1  | C20 | C19 | C24 | 177.4(3)  | C16 | S1  | C1  | C2  | -2.7(3)   |
| C1  | C20 | C21 | C22 | -177.4(3) | C16 | S1  | C1  | C20 | 171.2(3)  |
| C67 | N2  | C59 | C58 | 179.9(3)  | C16 | C15 | C14 | C17 | 1.5(5)    |
| C67 | N2  | C59 | C60 | -0.4(5)   | C16 | C15 | C14 | C13 | -178.7(3) |
| C67 | N2  | C61 | C66 | -113.0(4) | C3  | C2  | C1  | S1  | 1.2(4)    |
| C67 | N2  | C61 | C62 | 63.2(4)   | C3  | C2  | C1  | C20 | -173.7(3) |

|     |     |     |     |           |     |     |     |     |           |
|-----|-----|-----|-----|-----------|-----|-----|-----|-----|-----------|
| C67 | C68 | C69 | C70 | 1.2(6)    | C3  | C4  | C5  | C6  | 178.8(3)  |
| C36 | C31 | C32 | C33 | -0.2(5)   | C62 | C61 | C66 | C65 | -0.4(6)   |
| C26 | C25 | C30 | C29 | 0.8(5)    | C62 | C63 | C64 | C65 | 1.5(7)    |
| C60 | C55 | C56 | C37 | -174.7(3) | C5  | C4  | C3  | C2  | 3.7(6)    |
| C60 | C55 | C56 | C57 | 2.5(5)    | C5  | C4  | C3  | C16 | -176.4(3) |
| C50 | C53 | C40 | C39 | -0.4(5)   | C64 | C63 | C62 | C61 | -1.9(6)   |
| C50 | C53 | C40 | C41 | -179.6(3) | C51 | C50 | C49 | C48 | 179.0(3)  |
| C50 | C53 | C54 | C47 | 0.7(5)    | C46 | C45 | C44 | C43 | -0.3(6)   |
| C50 | C53 | C54 | C43 | -179.9(3) | C8  | C7  | C18 | C17 | 178.8(3)  |
| C50 | C49 | C48 | C47 | -0.8(6)   | C8  | C7  | C18 | C11 | 0.8(5)    |
| C59 | N2  | C67 | C72 | 95.4(4)   | C8  | C7  | C6  | C5  | 179.3(4)  |
| C59 | N2  | C67 | C68 | -83.3(4)  | C8  | C9  | C10 | C11 | -1.4(6)   |
| C59 | N2  | C61 | C66 | 50.2(5)   | C24 | C23 | C22 | C21 | -2.7(5)   |
| C59 | N2  | C61 | C62 | -133.6(4) | C43 | C54 | C47 | C48 | 178.8(3)  |
| C59 | C58 | C57 | C56 | -1.1(5)   | C43 | C54 | C47 | C46 | 0.0(5)    |
| C22 | C23 | C24 | C19 | 2.4(5)    | C6  | C7  | C18 | C17 | -0.8(5)   |
| C14 | C17 | C18 | C7  | -177.5(3) | C6  | C7  | C18 | C11 | -178.8(3) |
| C14 | C17 | C18 | C11 | 0.5(5)    | C6  | C7  | C8  | C9  | 178.7(3)  |

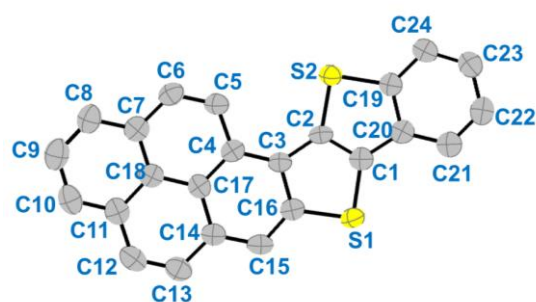

Figure S24 X-ray structure of PTBT-H

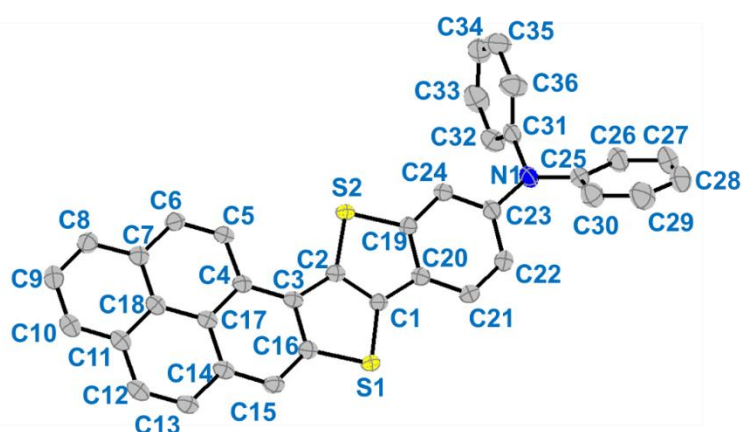

Figure S25 X-ray structure of PTBT-NPh<sub>2</sub>

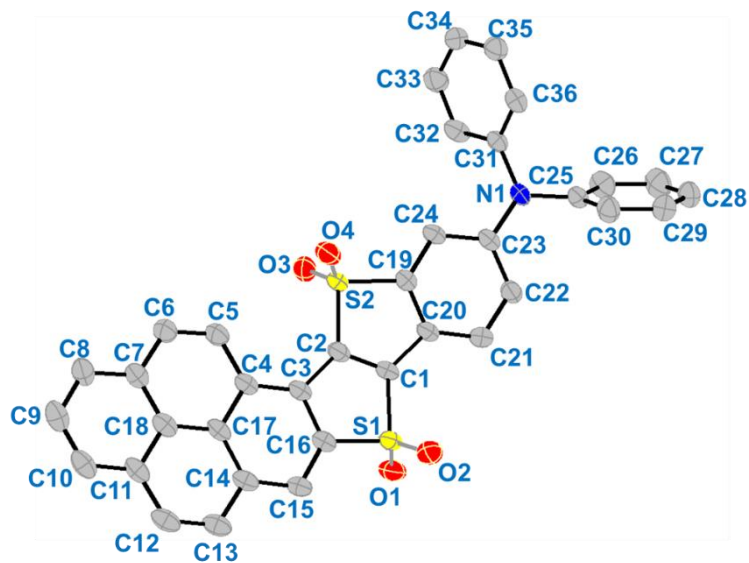

**Figure S26** X-ray structure of PTBT-O-NPh<sub>2</sub>

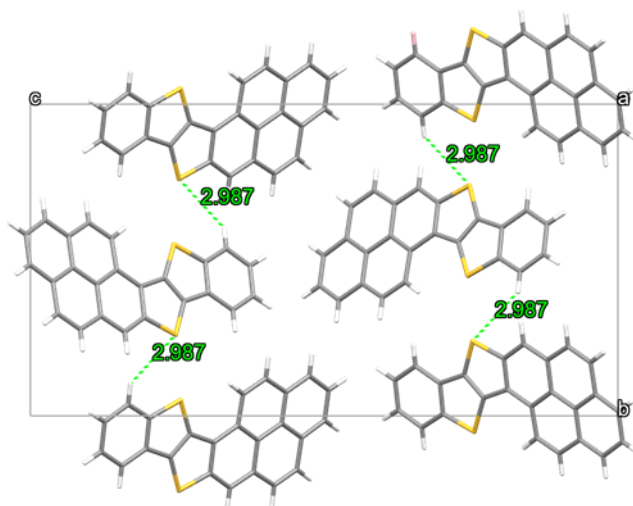

**Figure S 27** Packing diagram of PTBT-H.

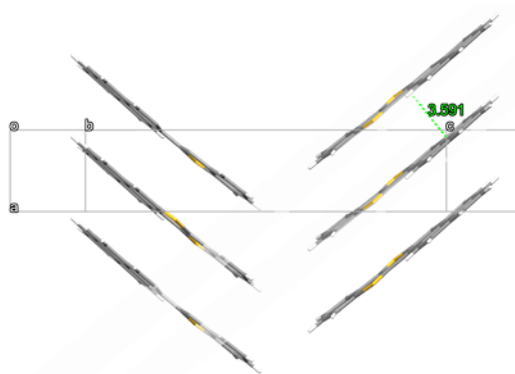

**Figure S 28** Packing diagram of PTBT-H.

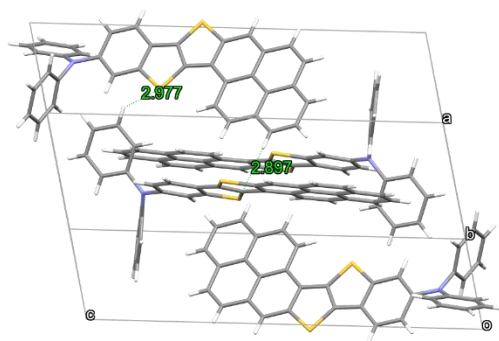

**Figure S 29** Packing diagram of PTBT-NPh<sub>2</sub>.

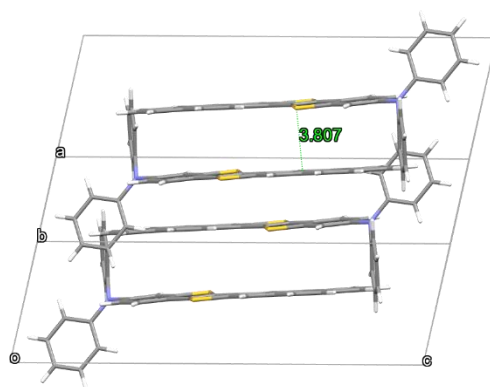

**Figure S 30** Packing diagram of PTBT-NPh<sub>2</sub>.

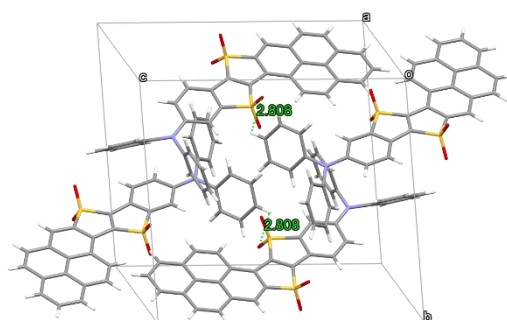

**Figure S 31** Packing diagram of PTBT-O-NPh<sub>2</sub>.

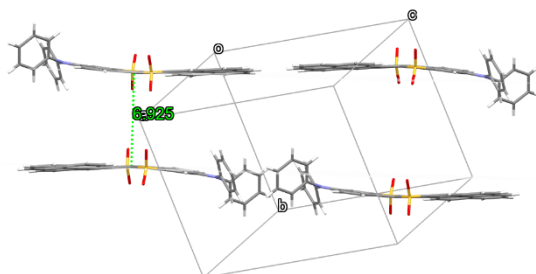

**Figure S 32** Packing diagram of PTBT-O-NPh<sub>2</sub>.

## 5. Photophysical measurements

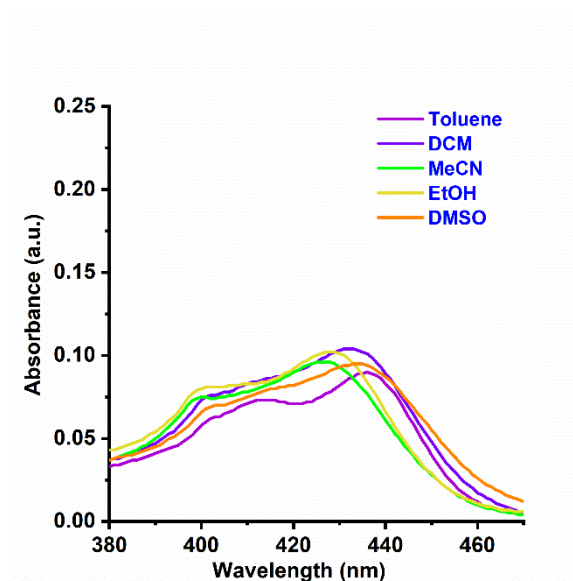

**Figure S33** UV-vis absorption spectra of PTBT-NPh<sub>2</sub> in different solvents at  $8.0 \times 10^{-5}$  mol/L

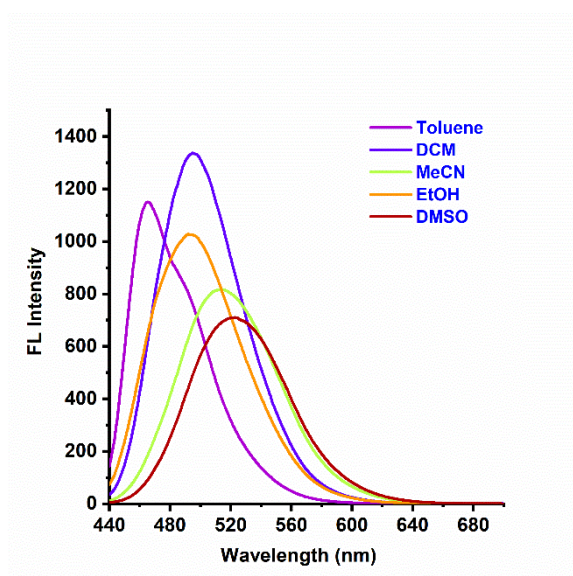

**Figure S34** Fluorescence emission spectra of PTBT-NPh<sub>2</sub> in different solvents at  $8.0 \times 10^{-5}$  mol/L

(ex = 430nm)



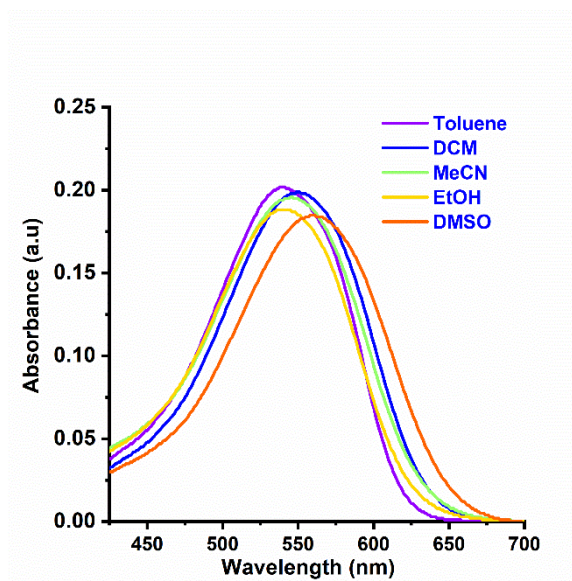

**Figure S35** UV-vis absorption spectra of **PTBT-O-NPh<sub>2</sub>** in different solvents at  $1.0 \times 10^{-5}$  mol/L

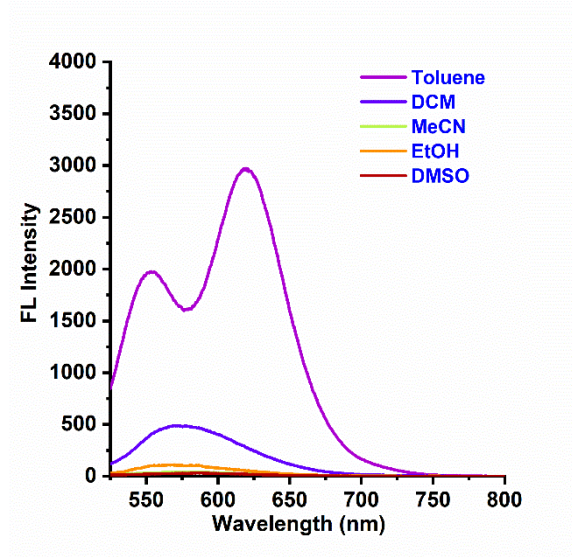

**Figure S36** Fluorescence emission spectra of **PTBT-O-NPh<sub>2</sub>** in different solvents at  $1.0 \times 10^{-5}$  mol/L (ex = 500 nm)

**Table S12** Photophysical Data for **PTBT-NPh<sub>2</sub>** and **PTBT-O-NPh<sub>2</sub>**

| Comp.                         | Solvent                         | $\lambda_{\text{abs}}/\text{nm}$ | $\epsilon/10^4\text{M}^{-1}\text{cm}^{-1}$ | $\lambda_{\text{em}}/\text{nm}$ | $\Phi_{\text{F}}$ | $\tau/\text{ns}$ | Stokes shift/ $\text{cm}^{-1}$ | Brightness ( $\epsilon*\Phi_{\text{F}}$ ) |
|-------------------------------|---------------------------------|----------------------------------|--------------------------------------------|---------------------------------|-------------------|------------------|--------------------------------|-------------------------------------------|
| <b>PTBT-NPh<sub>2</sub></b>   | Toluene                         | 436                              | 0.11                                       | 465                             | 0.57              | 1.01             | 1430                           | 641                                       |
|                               | CH <sub>2</sub> Cl <sub>2</sub> | 432                              | 0.13                                       | 495                             | 0.84              | 1.64             | 2946                           | 1092                                      |
|                               | THF                             | 432                              | 0.12                                       | 491.5                           | 0.95              | 2.03             | 2802                           | 812.71                                    |
|                               | EtOAc                           | 433                              | 0.11                                       | 495.5                           | 0.73              | 1.66             | 2913                           | 803                                       |
|                               | DMSO                            | 435                              | 0.12                                       | 523                             | 0.95              | 1.28             | 3868                           | 1129                                      |
|                               | EtOH                            | 428                              | 0.13                                       | 492                             | 0.62              | 2.03             | 3039                           | 790                                       |
|                               | MeOH                            | 433                              | 0.12                                       | 493                             | 0.51              | 1.66             | 2811                           | 612                                       |
| <b>PTBT-O-NPh<sub>2</sub></b> | Toluene                         | 540                              | 2.02                                       | 552                             | 0.64              | 4.27             | 403                            | 12736                                     |
|                               | CH <sub>2</sub> Cl <sub>2</sub> | 550                              | 1.99                                       | 572                             | 0.032             | 5.06             | 699                            | 640                                       |
|                               | EtOAc                           | 544                              | 1.95                                       | 564                             | 0.026             | 4.11             | 652                            | 507                                       |
|                               | THF                             | 541                              | 1.94                                       | 562.5                           | 0.027             | 4.15             | 706.5                          | 531.56                                    |
|                               | DMSO                            | 560                              | 1.85                                       | 586.5                           | 0.007             | 1.33             | 806                            | 135                                       |
|                               | EtOH                            | 541                              | 1.88                                       | 581.5                           | 0.003             | 2.22             | 1287                           | 54                                        |
|                               | MeOH                            | 543                              | 1.86                                       | 583                             | 0.002             | 2.04             | 1264                           | 37                                        |

## 6. Confocal Imaging

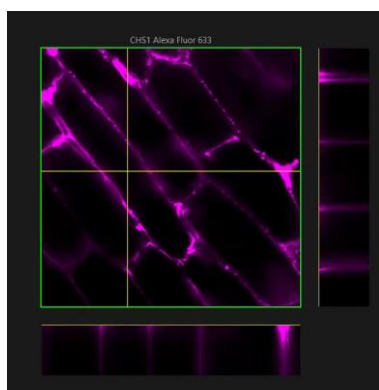**Figure S37** Photostability analysis of **DiD**

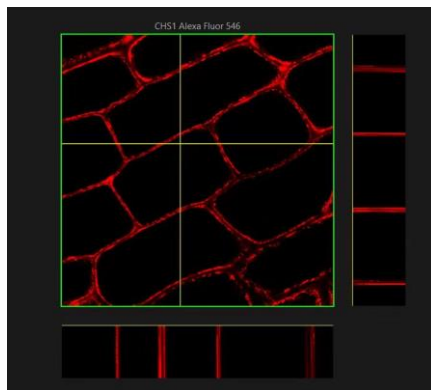

**Figure S38** Photostability analysis of **PTBT-O-NPh2**

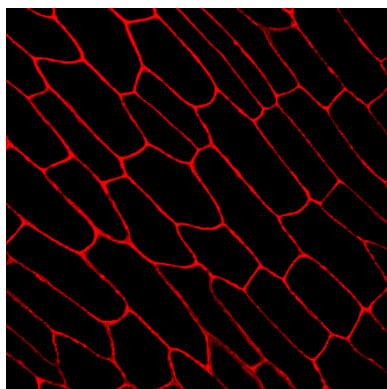

Figure S39 Imaging of onion inner epidermal cells after staining 48 h.

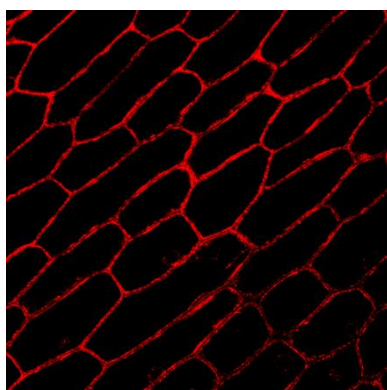

Figure S40 Imaging of onion inner epidermal cells after staining 120 h.

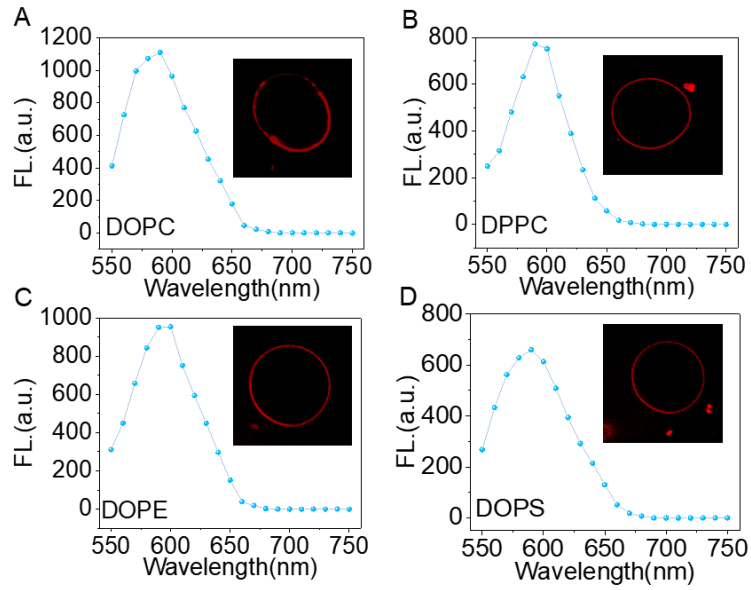

**Figure S41** In-situ spectra and confocal imaging of **PTBT-O-NPh<sub>2</sub>** in different MLVs.

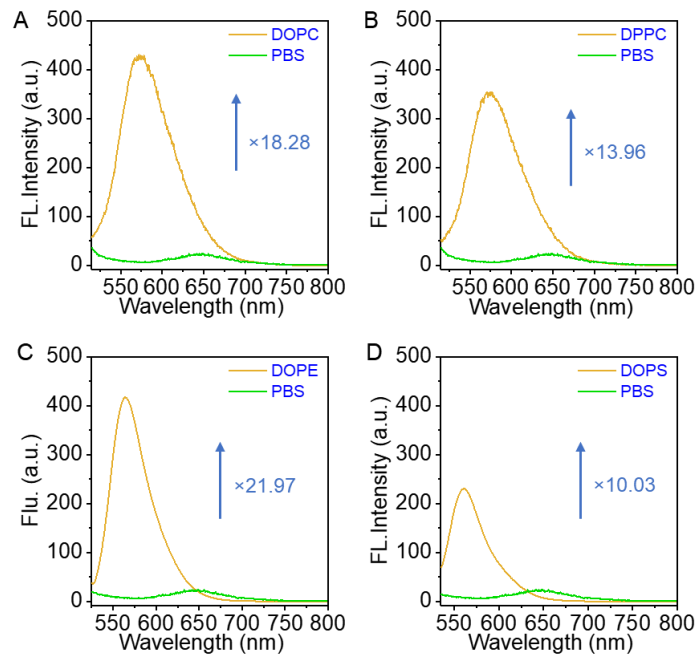

**Figure S42** Responsiveness of **PTBT-O-NPh<sub>2</sub>** to different phospholipids (DOPC, DPPC, DOPE, DOPS).

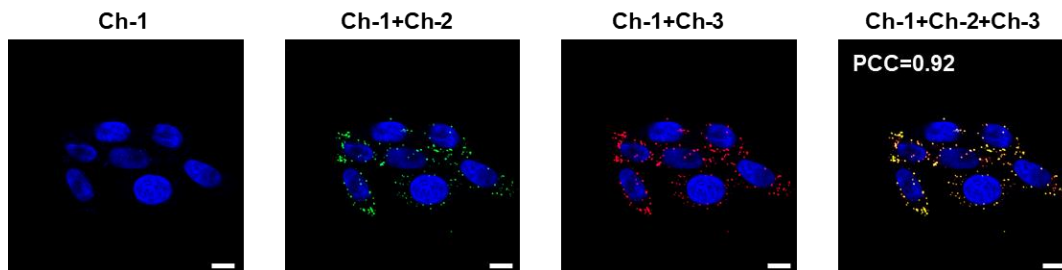

**Figure S43** Confocal images of HeLa cells incubated with **PTBT-O-NPh<sub>2</sub>** (10  $\mu$ M), **hocheist 33342** (5  $\mu$ M), and **Bodipy 493/503** (2.5  $\mu$ M). PCC: Pearson's correlation coefficient. Scale bar: 10  $\mu$ m.

Ch-1: **hochest 33342**,  $\lambda_{ex}$  =405 nm,  $\lambda_{em}$  =420-450 nm; Ch-2: **Bodipy 493/503**,  $\lambda_{ex}$  =473 nm,  $\lambda_{em}$  =500-530 nm; Ch-3: **PTBT-O-NPh<sub>2</sub>**,  $\lambda_{ex}$  =543 nm,  $\lambda_{em}$  =550-650 nm.

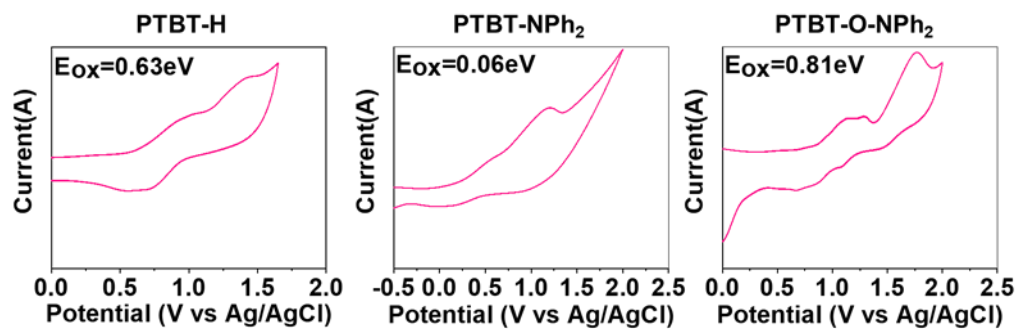

**Figure S44** Cyclic voltammety curves of compound **PTBT-H**, **PTBT-NPh<sub>2</sub>** and **PTBT-O-NPh<sub>2</sub>** at the scanning speed under 100 mV.
